---

Childhood body composition and BMI as a predictor of cardiometabolic non-communicable diseases in adulthood: A systematic review

By: Amela Bander<sup>1\*</sup>, Alexia J Murphy-Alford<sup>2</sup>, Victor O Owino<sup>2</sup>, Cornelia U Loechl<sup>2</sup>, Jonathan CK Wells<sup>3</sup>, Imara Gluning<sup>4</sup> and Marko Kerac<sup>1,5</sup>

<sup>1</sup> Department of Population Health, London School of Hygiene & Tropical Medicine, London, WC1E 7HT, UK; [amela.bander1@alumni.lshtm.ac.uk](mailto:amela.bander1@alumni.lshtm.ac.uk) (A.B); [marko.kerac@lshtm.ac.uk](mailto:marko.kerac@lshtm.ac.uk) (M.K)

<sup>2</sup> Nutritional and Health Related Environmental Studies Section, Division of Human Health, International Atomic Energy Agency, Vienna, Austria; [a.alford@iaea.org](mailto:a.alford@iaea.org) (A.J.M); [v.owino@iaea.org](mailto:v.owino@iaea.org) (V.O.O); [c.u.loechl@iaea.org](mailto:c.u.loechl@iaea.org) (C.U.L)

<sup>3</sup> Population, Policy and Practice Research Teaching Department, University College London, London EX1N 1EH, UK; [jonathan.wells@ucl.ac.uk](mailto:jonathan.wells@ucl.ac.uk) (J.C.K.W)

<sup>4</sup> Brighton and Sussex University Hospitals Trust, Brighton BN2 1ES, UK; [i.gluning@nhs.net](mailto:i.gluning@nhs.net) (I.G)

<sup>5</sup> Centre for Maternal, Adolescent, Reproductive & Child Health (MARCH), London School of Hygiene & Tropical Medicine, London WC1E 7HT, UK [marko.kerac@lshtm.ac.uk](mailto:marko.kerac@lshtm.ac.uk)

\* Correspondence: E-mail; [amela.bander1@alumni.lshtm.ac.uk](mailto:amela.bander1@alumni.lshtm.ac.uk)

**Abstract:** There is growing evidence that childhood malnutrition is associated with non-communicable diseases (NCDs) in adulthood and that body composition mediates some of this association. This review aims to determine: if childhood body composition can be used to predict later-life cardiometabolic NCDs; which measures of body composition best predict future NCDs. Three electronic databases were searched for studies where: children aged under 5 year had body composition measured; cardiometabolic health outcomes were measured a minimum of 10 years later. 29 studies met the inclusion criteria. Though a poor proxy measure of body composition, Body mass index (BMI) was commonly reported ( $n=28$ , 97%). 25% of these studies included an additional measure (Ponderal Index or skinfold thickness). Only some studies adjusted for current body size ( $n=11$ , 39%). Many studies reported that low infant BMI and high childhood BMI increased the risk of NCD-related outcomes in later life but no conclusions can be made about exact timing of child malnutrition and consequent impact on NCD. Because studies focused on BMI rather than direct measures of body composition, nothing can be said about which measures of body composition in childhood are most useful. Future research on child nutrition and long-term outcomes is urgently needed and should include validated body composition assessments as well as standard anthropometric and BMI measurements.

## 1. Introduction

Non-communicable diseases (NCDs), such as cardiovascular diseases, diabetes and chronic respiratory diseases, are the leading cause of mortality, equivalent to 71% of deaths worldwide, and are projected to increase even further, reaching 52 million deaths by 2030 [1].

Risk factors for NCDs include both social factors (poverty, education and stress) and biological (e.g. fetal epigenetic changes with life-course consequence): the former highly affects lifestyle factors such as diet and physical activity [2]. Early life malnutrition is also a key risk factor for NCDs and refers to insufficient energy- and/or nutrient intake; but also refers to an excessive and imbalanced energy intake, often resulting in overweight or obesity [3]. For assessing nutritional status in children and adults, anthropometric indicators of growth and body size such as weight-for-height (WHZ), weight-for-age (WAZ), body mass index (BMI) and mid-upper-arm circumference (MUAC) amongst others are commonly used [4]. However, there is growing evidence that anthropometry alone has marked limitations in describing nutrition-related risk (of morbidity/mortality)[5]. Body composition measures – of which there are several – are attracting interest as potentially much better indicators of both short- [6] and long-term risk [7,8].

There is extensive evidence that: exposure to in-utero undernutrition increases the risk of NCDs in later life [9–11] and being overweight in adulthood increases the risk of NCDs [12,13]. There is also emerging evidence relating to childhood exposures[14], one recent review finding that “*exposure to severe malnutrition or famine in childhood was consistently associated with increased risk of cardiovascular disease, hypertension, impaired glucose metabolism and metabolic syndrome in later life*” [15]. In attempts to better understand the link between such episodes of early-life malnutrition to later life health and NCD, an increasing number of studies are assessing body composition in childhood [16,17]. Whilst plausible [18], the links between body composition in early life and later-life NCDs are not currently well understood [19–24]. Our review thus aims to synthesize evidence on early life body composition and long-term cardiometabolic health, and to examine which measures of body composition best predict the risk of NCDs.

## 2. Materials and Methods

The PRISMA (Preferred Reporting Items for Systematic review and Meta-Analysis) protocol was used for this systematic review [25].

### 2.1 Inclusion/exclusion criteria

Inclusion criteria was based on PICOS outline:

- **Population:** Subjects who had nutritional status (BMI or body composition) measured at baseline at any time from birth up to 5 years of age with a follow-up time  $\geq 10$ y.
- **Intervention/exposure:** Exposure to any of the following body composition measurements: skinfolds, bioelectrical impedance analysis, dual-energy X-ray absorptiometry (DXA/DEXA) scan, isotope dilution and PEA POD air displacement plethysmography. Despite only being proxy indicators of body composition, we also included body mass index (BMI) and ponderal index (PI).
- **Comparator/control:** Studies with and without a control group are included.
- **Outcome:** Cardiometabolic non-communicable diseases (coronary artery disease, type 2 diabetes, metabolic syndrome) and their associated risk factors (obesity, blood pressure, blood glucose levels, lipid levels, waist circumference) measured  $\geq 10$ y after exposure.
- **Study design:** All study designs were considered eligible.

The review excluded studies with a high-risk study population, grey literature, unpublished studies, reviews, non-human studies and studies not published in English, in full format and before 1990.

## 2.2 Search strategy

The search was completed independently by two authors in three databases: *Embase Classic + Embase, Ovid MEDLINE (R) and In-Process & Other non-Indexed Citations and Daily*, and *Global Health*. The final search was conducted 27.07.2020. A detailed search strategy is shown in Appendix A.

## 2.3 Study selection

All records generated from the search were imported into Mendeley Reference Manager (version 1.19.4) and were screened by title and abstract. Articles that were deemed relevant or where more information was needed to determine relevance, were screened by full-text.

## 2.4 Data extraction

A data extraction form developed for this review was used to extract information from eligible studies. When obtainable, the following information was extracted: author, year, title, country, study design, sample size, percentage female, inclusion- and exclusion criteria, type of exposure and assessment method, type of outcome and assessment method, years of follow-up, adjustment for current body size, key findings and strength of evidence.

## 2.5 Data analysis

Due to heterogeneity amongst studies identified, the analysis is presented as a narrative synthesis. Results from high-income countries (HIC) and low- and middle-income countries (LMIC) are analysed separately and should not be compared.

## 2.6 Assessing risk of bias

An individual risk of bias assessment for each study was determined using the 'Quality appraisal checklist for quantitative studies reporting correlation and associations' in 'Methods for the development of NICE public health guidance' [26].

## 2.7 Study protocol

A pre-registered protocol for this review can be found at:

[https://www.crd.york.ac.uk/prospero/display\\_record.php?RecordID=188393](https://www.crd.york.ac.uk/prospero/display_record.php?RecordID=188393)

# 3. Results

## 3.1 Study selection

Selection process and search results are presented in Figure 1. The search generated 5772 records. Following deduplication and initial screening of titles and abstract, 78 articles were eligible for full-text review. Of these, 49 did not meet the inclusion criteria which led to a total of 29 studies included in the review.

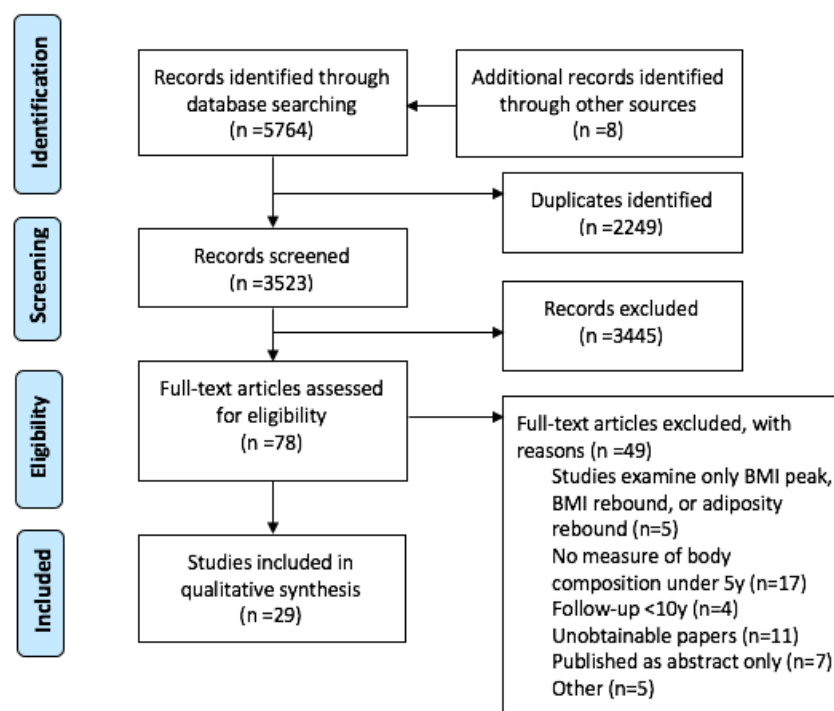

**Figure 1.** Study selection flow diagram.

### 3.2 Study characteristics

Study characteristics are presented in Table 1. Most studies were from HIC (n=21, 72%), and all but one study used BMI as the indicator of early life exposure / body composition (n=28, 97%). Few studies (n= 7, 25%) used an additional indicator, which were either ponderal index (n=4, 40%) or skinfold thickness (n=3, 38%). No studies used direct measures of body composition: bioelectrical impedance analysis, dual-energy X-ray absorptiometry (DXA/DEXA) scan, isotope dilution and PEA POD air displacement plethysmography).

Sample size included in the analysis ranged from 128 to 34196 participants. Participants were most often drawn from existing cohorts (of which 19 were birth cohorts), and 4 studies from HIC recruited the study population from health care registers from the respective countries. All studies were representative cohorts, although the study population in one Finnish study were exclusively normal-weight in adulthood [27] and the Guatemalan study population had a high prevalence of stunting (53% stunted by age 7) [28].

Studies included in the review were a mix of good, adequate and poor quality. External validity for 9 studies was rated to be of poor quality due to various reasons e.g. reduced power and significant proven differences between study population and participants who were lost to follow up.

1 **Table 1.** Study characteristics of included stories.

| Author (year)                | Country       | Study Design                                       | Sample size                       | Type of Exposure   | Age at Outcome Assessment (mean age in years) | Outcome Assessed            | Quality of study<br>External   Internal validity validity |    |
|------------------------------|---------------|----------------------------------------------------|-----------------------------------|--------------------|-----------------------------------------------|-----------------------------|-----------------------------------------------------------|----|
| <b>High-income countries</b> |               |                                                    |                                   |                    |                                               |                             |                                                           |    |
| Angbratt (2011) [29]         | Sweden        | Retrospective cohort                               | 3579                              | BMI, PI            | ~15 (14.5)                                    | Obesity (BMI>30)            | +                                                         | ++ |
| Barker (2005) [30]           | Finland       | Birth cohort 1934-44                               | 444<br>(clinical subset n=2003)   | BMI, PI            | ~37-64 (n/r)                                  | Coronary risk factors       | +                                                         | ++ |
| East (2020) [31]             | Chile         | Retrospective cohort (Santiago Longitudinal Study) | 1000                              | BMI                | ~23 (n/r)                                     | Cardiometabolic risk        | ++                                                        | +  |
| Eriksson (2003) [32]         | Finland       | Birth cohort 1934-44                               | 444<br>(clinical subset n=2003)   | BMI, PI            | ~56-66 (n/r)                                  | Obesity (BMI>30)            | +                                                         | +  |
| Eriksson (2015) [33]         | Finland       | Birth cohort 1934-44                               | 13345<br>(clinical subset n=2003) | BMI                | 40+ (Clinical subsample: 62)                  | T2D                         | ++                                                        | ++ |
| Evensen (2019) [34]          | Norway        | Prospective cohort (The Tromsø Study: Fit Futures) | 907                               | BMI                | ~15-20 (n/r)                                  | Overweight/obesity (BMI>25) | ++                                                        | ++ |
| Geserick (2018) [35]         | Germany       | Retrospective cohort                               | 34196                             | BMI                | ~18 (n/r)                                     | Obesity (BMI>30)            | ++                                                        | +  |
| Giudici (2017) [36]          | France        | Retrospective cohort                               | 1919                              | BMI                | ~20-60 (30.7)                                 | MetS risk factors, WC       | -                                                         | +  |
| Golab (2018) [37]            | Netherlands   | Birth cohort (Generation R Study)                  | 593                               | Skinfold thickness | ~10 (n/r)                                     | Adiposity                   | -                                                         | +  |
| Graversen (2014) [38]        | Finland       | Birth cohort 1996                                  | 2120                              | BMI                | ~31 (n/r)                                     | BMI, WC, MetS risk factors  | ++                                                        | ++ |
| Holland (1993) [39]          | Great Britain | Birth cohort                                       | 2830                              | BMI                | ~36 (n/r)                                     | BMI, BP                     | -                                                         | ++ |

|                                         |               |                                               |                                                  |                         |               |                              |    |    |
|-----------------------------------------|---------------|-----------------------------------------------|--------------------------------------------------|-------------------------|---------------|------------------------------|----|----|
| Howe (2010) [40]                        | UK            | (NHSD)<br>Birth cohort (Avon)                 | 5113                                             | BMI, PI                 | ~15 (15.5)    | Cardiovascular disease risk  | -  | ++ |
| Howe (2014) [41]                        | England       | Birth cohort (Avon)                           | 3154                                             | BMI                     | ~17 (17.8)    | BP                           | -  | ++ |
| Huang (2012) [42]                       | Australia     | Birth cohort (Raine)                          | 1053                                             | BMI, skinfold thickness | ~17 (n/r)     | Cardiovascular disease risk  | ++ | +  |
| Johnson (2014) [43]                     | Great Britain | Birth cohort (NSHD)                           | 1273                                             | BMI                     | ~60-64 (n/r)  | cIMT                         | ++ | ++ |
| Johnson (2017) [44]                     | USA           | Birth cohort (Fels Longitudinal Study)        | 350                                              | BMI                     | ~20-60 (n/r)  | Adiposity                    | ++ | ++ |
| Kwon (2017) [45]                        | USA           | Birth cohort (Iowa Fluoride Study)            | 1093<br>(clinical subset at 8y n=495, 19y n=314) | BMI                     | ~8, 19 (n/r)  | Adiposity                    | +  | +  |
| Lagström (2008) [46]                    | Finland       | Prospective randomized trial (STRIP)          | 541                                              | BMI                     | ~13 (n/r)     | Obesity (BMI>30)             | ++ | +  |
| Lammi (2009) [47]                       | Finland       | Case-control                                  | 128                                              | BMI                     | ~15-39 (34.5) | T2D diagnose                 | -  | +  |
| Salonen (2009) [27]                     | Finland       | Birth cohort 1934-44                          | 588<br>(clinical subset: 2003)                   | BMI                     | ~56-70 (61.5) | BMI, MetS risk factors       | +  | ++ |
| Skidmore (2007) [48]                    | Great Britain | Birth cohort (NSHD)                           | 2311                                             | BMI                     | ~53 (n/r)     | Lipid levels                 | +  | ++ |
| Ziyab (2015) [49]                       | UK            | Birth cohort (The Isle of Wight birth cohort) | 1240                                             | BMI                     | ~18 (n/r)     | BP                           | ++ | ++ |
| <b>Low- and middle-income countries</b> |               |                                               |                                                  |                         |               |                              |    |    |
| Bhargava (2004) [50]                    | India         | Birth cohort (New Deli Birth Cohort)          | 1526                                             | BMI                     | ~18 (n/r)     | BP, adiposity                | -  | +  |
| Corvalán (2007) [28]                    | Guatemala     | Prospective cohort (INCAP study)              | 710                                              | BMI                     | ~33-35 (32.7) | Adiposity                    | +  | ++ |
| Fall (2008) [51]                        | India         | Birth cohort (New Deli Birth Cohort)          | 1583                                             | BMI                     | ~26-32 (n/r)  | Adiposity, MetS risk factors | -  | +  |

|                                |                 |                                      |      |                         |               |                             |    |    |
|--------------------------------|-----------------|--------------------------------------|------|-------------------------|---------------|-----------------------------|----|----|
| <b>Krishnaveni (2015) [52]</b> | India           | Birth cohort (Mysore Parthenon)      | 414  | BMI, skinfold thickness | ~13.5 (n/r)   | Adiposity, T2D risk factors | ++ | ++ |
| <b>Raghupathy (2010) [53]</b>  | India           | Birth cohort (Vellore 1969-73)       | 2218 | BMI                     | ~26-32 (28.3) | T2D risk factors            | +  | ++ |
| <b>Sachdev (2005) [54]</b>     | India           | Birth cohort (New Deli Birth Cohort) | 1526 | BMI                     | ~26-32 (n/r)  | Adiposity                   | -  | +  |
| <b>Weitz (2014) [55]</b>       | Solomon Islands | Prospective cohort                   | 540  | BMI, skinfold thickness | ~19-38 (n/r)  | TC, TG                      | ++ | ++ |

2 Notes: (++) means 'good quality of study', (+) means 'adequate quality of study', (-) means 'poor quality of study'.

3 Abbreviations:

4 BMI: body mass index; BP: blood pressure; cIMT: carotid intima-media thickness; MetS: metabolic syndrome; TC: total cholesterol; TG: total glucose; T2D: type 2 diabetes; PI:

5 ponderal index; WC: waist circumference

6

### 7 3.3 Synthesis of results

8 Table 2 presents a summary of included studies. A detailed summary can be found in Appendix B. The following  
9 section describes the results of the included studies.

10

#### 11 3.3.1 Cardiovascular outcomes

##### 12 High-income countries

13 A study looking at cardiovascular disease (CVD) risk found that females who had increased BMI and skinfold (SF)  
14 thicknesses from ages 1-5y had increased risk of CVD (BMI:  $p<0.001$ ; SF thicknesses:  $p<0.05$ ). High-risk males had  
15 increased BMI at 3y ( $p<0.001$ ) and increased SF thicknesses from 3-5y ( $p<0.001$ ) [42]. Another study reporting on CVD  
16 risk did not find any association before 5y, but reported that increased BMI in later childhood was associated with  
17 increased CVD risk [40].

18

19 Four studies reported on blood pressure (BP). One found that low BMI at birth was associated with increased BP. The  
20 researchers also found that there was no association between BMI below 7y and later BP, however, those subjects with  
21 the highest BP had a low birthweight and were overweight or obese at age 2 and time of exposure [41]. Another  
22 reported that a 1 unit increase in BMI SDS from birth to 7y was associated with elevated blood pressure. Changes in  
23 systolic blood pressure (sBP) were greater in females than in males (1.4 mmHg vs 0.7mmHg), but in contrast  
24 diastolic blood pressure (dBP) was greater in males than in females (1.0mmHg vs 0.5mmHg) [39]. Another study  
25 measuring BP reported that children who became obese early in life and who had a delayed overweight (overweight  
26 at 10 and 18y) had higher BP at follow-up than those with a healthy weight in childhood (all  $p<0.001$ ) [49]. A Finnish  
27 study found that sBP fell both with increasing birth weight and increasing BMI at 2y. The researchers also reported on  
28 the prevalence of coronary events and found that adults who experienced coronary events were smaller than average  
29 at birth and had a BMI below average at age 2. After age 2 and 4 (for boys and girls, respectively), their BMI increased  
30 progressively. The authors concluded that "The risk of coronary events was more strongly related to the tempo of  
31 childhood gain in BMI than to the BMI attained at any particular age" [30].

32

33 Results from a British cohort examined carotid intima-media thickness (cIMT) and found that boys with a BMI in the  
34 upper quartiles had increased odds of high cIMT with 1 unit increase in z-score BMI at 4y (OR1.26; $p=0.03$ ) vs boys  
35 with a BMI in the three lower quartiles. They found no such association in women ( $p>0.05$ ) [56].

36

37 Another British cohort reported on lipid levels at age 53 and found that a 1 SD increase in BMI at ages 2 and 4 was  
38 associated with lower levels of total cholesterol (TC) ( $p=0.007$  and  $p=0.003$  respectively) and an increase in BMI from  
39 7-15y was associated with lower levels of high-density lipoprotein cholesterol (HDL-C) with the association being  
40 stronger and greater in women. The researchers adjusted for current body size [48].

41

##### 42 Low- and middle-income countries

43 A study from India found that fat gain measured by skinfolds from 5y onwards was associated with elevated sBP in  
44 adulthood [52].

45 A study from Melanesia reporting on TC found that BMI z residuals from 0-5y in males were associated with  
46 increased TC. In females, there was an positive association between skinfold (SF) residuals from 0-5y and CVD, and  
47 BMI z residuals from 6-11y and CVD [55].



48 **Table 2.** Summary of studies reporting on cardiovascular disease outcomes.

| Author (year)                | Sample size                        | Type of Exposure | Age at Outcome Assessment (mean age in years) | Cardiovascular disease outcomes                                                                                                                                                                                                                                                                                                                                                                                                                                                                                                                                                                                                                                                                                                                                                                                                                                                                                                                                                                                                                       |
|------------------------------|------------------------------------|------------------|-----------------------------------------------|-------------------------------------------------------------------------------------------------------------------------------------------------------------------------------------------------------------------------------------------------------------------------------------------------------------------------------------------------------------------------------------------------------------------------------------------------------------------------------------------------------------------------------------------------------------------------------------------------------------------------------------------------------------------------------------------------------------------------------------------------------------------------------------------------------------------------------------------------------------------------------------------------------------------------------------------------------------------------------------------------------------------------------------------------------|
| <b>High-income countries</b> |                                    |                  |                                               |                                                                                                                                                                                                                                                                                                                                                                                                                                                                                                                                                                                                                                                                                                                                                                                                                                                                                                                                                                                                                                                       |
| <b>Barker (2005) [30]</b>    | 444<br>(clinical subset<br>n=2003) | BMI, PI          | ~37-64 (n/r)                                  | <p>↑ BP with a 1SD z-score increase in BMI (7y, 10y). Associations stronger in males.</p> <p><u>Females:</u><br/>           ↑BP in subjects with low BMI at birth<br/>           ↓BMI (6mo, 2y) associated with coronary events.<br/>           ↑BMI (4y onwards) associated with coronary events.</p> <p>BMI (2y, 11y) predicted coronary events in a simultaneous regression.</p> <p>The hazard ratios associated with an increase in BMI of 1 SD were 0.62 at 2 years of age and 1.35 at 11 years.</p> <p><u>Males:</u><br/>           ↑brachial sBP in subjects with low BMI at birth<br/>           ↓BMI and PI at birth and BMI (1y, 2y) predicted coronary events.<br/>           ↑BMI (2y onwards) associated with coronary events.</p> <p>The hazard ratios associated with an increase in BMI of 1 SD were 0.76 at 2 years of age and 1.14 at 11 years.</p> <p><u>Females:</u><br/>           ↑ BP with 1 unit increase in BMI SDS (birth to 7y)</p> <p><u>Males:</u><br/>           ↑ BP with 1 unit increase in BMI SDS (birth to 7y)</p> |
| <b>Holland (1993) [39]</b>   | 2830                               | BMI              | ~36 (n/r)                                     | <p><u>Females:</u><br/>           ↑ BP with 1 unit increase in BMI SDS (birth to 7y)</p> <p><u>Males:</u><br/>           ↑ BP with 1 unit increase in BMI SDS (birth to 7y)</p>                                                                                                                                                                                                                                                                                                                                                                                                                                                                                                                                                                                                                                                                                                                                                                                                                                                                       |

|                      |      |                         |              |                                                                                                                                                                                                                                                                                                                                                                                                                                                             |
|----------------------|------|-------------------------|--------------|-------------------------------------------------------------------------------------------------------------------------------------------------------------------------------------------------------------------------------------------------------------------------------------------------------------------------------------------------------------------------------------------------------------------------------------------------------------|
| Howe (2010) [40]     | 5113 | BMI, PI                 | ~15 (15.5)   | <p>↑CVD risk with 1SD BMI z-score increase (5-5.5y, 7-8.5y, 8.5-10y)</p>                                                                                                                                                                                                                                                                                                                                                                                    |
| Howe (2014) [41]     | 3154 | BMI                     | ~17 (17.8)   | <p>↑ BP with a 1SD z-score increase in BMI (7y, 10y). Associations stronger in males. No association between BMI &lt;7y and later BP.</p> <p>Highest BP was seen in those with a low birthweight as well as overweight or obesity at age 2 and age 17.</p> <p><u>Females:</u><br/>↑sBP and dBP in subjects with low BMI at birth</p> <p><u>Males:</u><br/>↑ sBP in subjects with low BMI at birth</p>                                                       |
| Huang (2012) [42]    | 1053 | BMI, skinfold thickness | ~17 (n/r)    | <p>BP, insulin, glucose, TG, BMI, TC, HDL-C, LDL-C and high-sensitive CRP were assessed, and study population was divided into “high-risk” and “low-risk” cluster according to their results. Trajectories of BMI and SF were then analysed separately for each group. All findings are in high risk vs low risk cluster.</p> <p><u>Females:</u><br/>↑BMI (1-5y)<br/>↑SF thicknesses(1-5y)</p> <p><u>Males:</u><br/>↑BMI (3y)<br/>↑SF thicknesses(3-5y)</p> |
| Johnson (2014) [43]  | 1273 | BMI                     | ~60-64 (n/r) | <p><u>Males:</u><br/>↑Odds of high cIMT with 1 unit increase in z-score BMI (4y, 20y) in the upper vs the 3 lower quartiles.</p>                                                                                                                                                                                                                                                                                                                            |
| Skidmore (2007) [48] | 2311 | BMI                     | ~53 (n/r)    | <p><u>Females:</u> no association.<br/>↓HDL-C with 1 unit increase in BMI SDS (7-15y).</p>                                                                                                                                                                                                                                                                                                                                                                  |

|                                   |      |                         |              |                                                                                                                                                                                                                                                                                                                                                                                          |
|-----------------------------------|------|-------------------------|--------------|------------------------------------------------------------------------------------------------------------------------------------------------------------------------------------------------------------------------------------------------------------------------------------------------------------------------------------------------------------------------------------------|
| Ziyab (2015) [49]                 | 1240 | BMI                     | ~18 (n/r)    | <p>↓TC with 1 unit increase in BMI SDS (2 and 4y)<br/>Trajectories of BMI were analysed, study population was divided into “early persistent obesity”, “delayed overweight” and “normal”.</p> <p>↑BP in early persistent obesity trajectory and delayed overweight vs normal</p>                                                                                                         |
| Low- and middle- income countries |      |                         |              |                                                                                                                                                                                                                                                                                                                                                                                          |
| Weitz (2014) [55]                 | 540  | BMI, skinfold thickness | ~19-38 (n/r) | <p><u>Females:</u><br/>           ↑TC associated with BMI Z residuals (6-11y and 12-19y)<br/>           ↑TC associated with subscapular SF residuals (0-5y)<br/>           ↑TG associated with BMI Z residuals (12-19)</p> <p><u>Males:</u><br/>           ↑TC associated with BMI Z residuals (0-5y)<br/>           ↑TG associated with subscapular SF thickness (6-11y and 12-19y)</p> |

49 Notes: ↑= increased; ↓=decreased.

50 Abbreviations: **BMI**: body mass index; **BP**: blood pressure; **cIMT**: carotid intima-media thickness; **CVD**: cardiovascular; **dBp**: diastolic blood pressure; **HDL-C**: high density lipoprotein cholesterol; **HR**: hazard ratio; **n**: sample size included in analysis; **PI**: ponderal index; **sBP**: systolic blood pressure; **SD**: standard deviation; **SDS**: standard deviation score; **SF**: skinfold; **TC**: total cholesterol; **TG**: total glucose

53 3.3.2 *Glucose metabolism outcomes*

54 *High-income countries*

55 Two studies reported on the risk of type 2 diabetes (T2D). One from Finland found that a gain of  
56 1kg/m<sup>2</sup> in subjects who had the minimum BMI from 3-11y had an increased risk of T2D vs those who  
57 gained less than 1kg/m<sup>2</sup> (OR1.87;p=0.04) [47]. Another Finnish study reported that children who had  
58 a BMI above the study population median at 11y had a decreased risk of T2D with each unit increase  
59 in BMI z-score from 0-7 y. After 7y the same group had an increased risk of T2D with each unit  
60 increase in BMI z-score. Association was greater and stronger in females (females: OR1.35;p=0.004,  
61 males: OR1.23;p=0.01). Researchers found that within the same group, a low BMI at birth and at 2y  
62 and a high BMI at 11y were associated with T2D. The group with a BMI below the study population  
63 median at 11y had a decreased risk of T2D with each unit increase in BMI z-score from 0-11y. In this  
64 group a low BMI at birth was associated with T2D [33].

65

66 A different Finnish study assessed fasting plasma glucose and insulin resistance and found that low  
67 birth weight, low BMI at 2y and an increase in SD scores for BMI from 2-11y were associated with  
68 raised fasting plasma glucose and insulin resistance [30].

69

70 A study reporting on hyperglycaemia in Chile found that subjects with hyperglycaemia typically had  
71 an increased BMI from approximately 2y onwards [31].

72

73 *Low- and middle-income countries*

74 A study from India looking at impaired glucose tolerance/diabetes mellitus (IGT/DM) found that a PI  
75 at birth and BMI in childhood close to a z-score of 0 were protective against IGT/DM (OR0.80;p=0.04  
76 and OR0.77;p<0.001, respectively). Greater changes in BMI z-score from birth to adulthood were  
77 associated with increased odds of IGT/DM that grew stronger by age (all p<0.001, see Appendix B for  
78 all ORs). Researchers concluded that those with IGT/DM in adulthood were typically LBW-infants  
79 and that IGT/DM was associated with low BMI in childhood, followed by an accelerated BMI gain  
80 between birth, infancy, childhood or adolescence and adulthood [53].

81 Another study from India reporting on DM found that there were increased odds of diabetes per SD  
82 score BMI increase from 2-11y (OR1.25;p=0.01) and that subjects with diabetes had more rapid  
83 weight/BMI gain throughout infancy, childhood and adolescence as well as a lower BMI in infancy  
84 [51]. A different study, using the study population from the same birth cohort, found a similar  
85 association: increased odds of IGT/DM with a low BMI at 1y and with a 1SD BMI z-score increase  
86 from 2-12y, which attenuated after adjustment for current body size (OR1.36;p<0.001 and  
87 OR1.26;p=0.004, respectively). Researchers also found an association with low PI at birth and  
88 increased plasma glucose and insulin concentrations and insulin resistance at follow-up, and noted  
89 that subjects who developed DM/IGT typically had a lower PI and BMI up to the age of 2 [50]. A  
90 study reporting on insulin concentrations did not find an association with BMI and skinfolds in the  
91 first 5y post-natal but did associate fat gain measured by skinfolds from 5y onwards with increased  
92 fasting insulin concentrations and insulin resistance [52].

93

94 One study reporting on total glucose did not find any association with BMI and skinfolds in early life  
95 but did find that BMI residuals in females aged 12-19y were associated with increased total glucose.  
96 In males, the researchers reported that SF residuals at ages 6-11y and 12-19y were associated with  
97 increased levels of total glucose [55].

98 **Table 3.** Summary of studies reporting on glucose metabolism outcomes.

| Author (year)                | Sample size                    | Type of Exposure | Age at Outcome Assessment (mean age in years) | Glucose metabolism outcomes                                                                                                                                                                                                                                                                                                                                                                                                                                |
|------------------------------|--------------------------------|------------------|-----------------------------------------------|------------------------------------------------------------------------------------------------------------------------------------------------------------------------------------------------------------------------------------------------------------------------------------------------------------------------------------------------------------------------------------------------------------------------------------------------------------|
| <b>High-income countries</b> |                                |                  |                                               |                                                                                                                                                                                                                                                                                                                                                                                                                                                            |
| <b>Barker (2005) [30]</b>    | 444 (clinical subset n=2003)   | PI, BMI          | ~34-64                                        | <p>For both sexes fasting plasma glucose and insulin fell both with increasing birth weight and with increasing BMI at 2y.</p> <p>↑plasma glucose and insulin resistance associated with low birth weight (LBW), low BMI at 2y and an increase in SD scores for BMI from age 2-11.</p>                                                                                                                                                                     |
| <b>East [31]</b>             | 1000                           | BMI              | ~23                                           | <p>Hyperglycemia was assessed, and study population was divided into “risk present” and “risk absent” cluster according to their results. Trajectories of BMI were then analysed separately for each group.</p> <p>↑ BMI (2-23y) in subjects with hyperglycemia</p> <p>Results are presented as “risk present vs risk absent”: <i>slope 6mo-5y: 0.05 vs -0.12, intercept 5y: 18.05 vs 16.78, slope 5-23y: 3.17 vs 2.93</i></p>                             |
| <b>Eriksson (2015) [33]</b>  | 13345 (clinical subset n=2003) | BMI              | 40+ (Clinical subsample: 62)                  | <p>Outcomes were assessed, study population was divided into “BMI above the median at 11y” (group 1) and “BMI below the median at 11y” (group 2). Trajectories of BMI were then analysed separately for each group.</p> <p>↓Risk of T2D with each unit increase in BMI z-score (0-7y) (group 1).</p> <p>↑Risk of T2D with each unit increase in BMI z-score (7y onwards) (group 1).</p> <p>↓Risk of T2D with each unit increase in BMI z-score (0-11y)</p> |

(group 2).

In group 1, low BMI at birth and at 2y and high BMI at 11y was associated with T2D.

In group 2, low BMI was associated with T2D.

↑Risk of T2D with a gain of 1kg/m<sup>2</sup> in the minimum BMI (3-11y) vs controls

Lammi (2009) [47] 128 BMI ~15-39 (34.5)

## Low- and middle- income countries

Bhargava (2004) [50] 1526 BMI ~18 (n/r)

Low PI at birth associated with increased plasma glucose and insulin concentrations and insulin resistance at follow-up. It was not associated with IGT/DM.

↑Odds of IGT/DM with low BMI at 1y.

↑Odds of IGT/DM with 1SD BMI z-score increase (2-12y).

↑Odds of T2D per SD score BMI increase (2-11y)

↑Fasting insulin concentrations and HOMA-IR associated with fat gain (5y onwards)

↓Odds of IGT/DM with a PI at birth close to a Z-score of 0

↓Odds of IGT/DM with a childhood BMI close to a Z-score of 0

Fall (2008) [51] 1583 BMI ~26-32 (n/r)

Krishnaveni (2015) [52] 414 BMI, skinfold thickness ~13.5 (n/r)

Raghupathy (2010) [53] 2218 BMI ~26-32 (28.3)

↑Odds of IGT/DM with increase in BMI z-scores from birth-adulthood, infancy-adulthood, childhood-adulthood, adolescent-adulthood. Association grew stronger with age.

Females:

↑TG associated with BMI z residuals (12-19)

Males:

↑TG associated with subscapular SF thickness (6-11y and 12-19y)

Weitz (2014) [55] 540 BMI, skinfold thickness ~19-38 (n/r)

100 Abbreviations: **BMI**: body mass index; **DM**: diabetes mellitus; **HOMA-IR**: Homeostatic Model Assesment for Insulin Resistance; **IGT**: impaired glucose tolerance; **LBW**: low  
101 **birth weight**; **n**: sample size included in analysis; **SD**:standard deviation; **SDS**: standard deviation score; **SF**:skinfold; **TG**: total glucose; **T2D**: type 2 diabetes

102

103 3.3.3 *Metabolic syndrome outcomes*

104 *High-income countries*

105 Four studies reported on metabolic syndrome (MetS). One study found no association with MetS and body size at  
106 birth and 2 years. However, changes in BMI in infancy were predictive, with a 1 SD z-score increase in BMI from 0-2y  
107 in males was associated with decreased odds of MetS in adulthood (OR0.53;0.33-0.87). Though similar was observed  
108 in women, those changes were not statistically significant. Researchers adjusted for current body size and did not  
109 report unadjusted results [27].

110 Another study reported that subjects with a BMI in the  $\geq 50$ -<75 and  $\geq 95$  percentile had increased risk of MetS vs  
111 those in the  $\geq 5$ -<50 percentile (RR1.9 vs RR1.6). Subjects with a BMI above the  $\geq 95$  percentile at 4y and 5y had a  
112 slightly greater risk of MetS vs those in the  $\geq 5$ -<50 percentile (RR2.5 vs RR2.4) [38]. Similarly, another study from  
113 France found that subjects with MetS had an increased BMI at 4-6y and 7-10y ( $p=0.01$  and  $p<0.001$ , respectively) [36].

114 A Chilean study reported that subjects who had MetS, had higher and faster growth in BMI from ages 6mo-23y  
115 [31].

116

117 *Low- and middle-income countries*

118 Fall et al. found that the odds of MetS increased per SD score BMI change from 2-11y (OR1.48;  $p<0.001$ ) and that  
119 subjects with MetS had a more rapid weight/BMI gain throughout infancy, childhood and adolescence [51].

120

---



121 **Table 4.** Summary of studies reporting on metabolic syndrome outcomes.

| Author (year)         | Sample size | Type of Exposure | Age at Outcome Assessment (mean age in years) | Metabolic syndrome outcomes                                                                                                                                                                                                                                                                                                                                                                                                                                                                   |
|-----------------------|-------------|------------------|-----------------------------------------------|-----------------------------------------------------------------------------------------------------------------------------------------------------------------------------------------------------------------------------------------------------------------------------------------------------------------------------------------------------------------------------------------------------------------------------------------------------------------------------------------------|
| High-income countries |             |                  |                                               |                                                                                                                                                                                                                                                                                                                                                                                                                                                                                               |
| East (2020) [31]      | 1000        | BMI              | ~23 (n/r)                                     | <p>MetS was assessed, and study population was divided into “risk present” and “risk absent” cluster according to their results. Trajectories of BMI were then analysed separately for each group.</p> <p>∧BMI (6mo-23y) in subjects with MetS.</p> <p>Results are presented as “risk present vs risk absent”:<br/> <i>slope 6mo-5y: 0.07 vs -0.13, intercept 5y: 18.44 vs 16.59, slope 5-23y: 4.22 vs 3.03.</i></p>                                                                          |
| Giudici (2017) [36]   | 1919        | BMI              | ~20-60 (30.7)                                 | <p>MetS was assessed, study population was divided into “with Mets” and “without Mets”. Trajectories of BMI and WC were then analysed separately for each group.</p> <p>∧BMI (4-6y, 7-10y) in adults with MetS vs without MetS.<br/>         ∧WC associated with higher BMI (0-10y).</p> <p>No association between low ∆HDL-C and BMI in childhood.<br/>         No association between hyperglycemia and BMI in childhood.<br/>         No association between ∆BP and BMI in childhood.</p> |
| Graversen (2014) [38] | 2120        | BMI              | ~31 (n/r)                                     | <p>∧Risk of MetS with a BMI in the ≥50-&lt;75 and ≥95 percentile (3y) vs those in the ≥5-&lt;50 percentile.</p> <p>∧Risk of MetS with a BMI at the ≥95 percentile (4y, 5y) vs those in the ≥5-&lt;50 percentile.</p> <p><u>Males:</u></p>                                                                                                                                                                                                                                                     |
| Salonen (2009) [27]   | 588         | BMI              | ~56-70 (61.5)                                 |                                                                                                                                                                                                                                                                                                                                                                                                                                                                                               |

(clinical  
subset: 2003)

↓Odds of MetS with 1SD z-score increase in BMI (0-2y)

Females: No statistical association was seen in women.

Low- and middle-income countries

Fall (2008) [51]

1583

BMI

~26-32 (n/r)

↑Odds of MetS per SD score BMI change (2-11y).

Subjects with MetS had higher mean BMI than the cohort mean at all ages from birth.

122 Notes: ↑= increased; ↓=decreased.

123 Abbreviations: *a*: adult; **BMI**: body mass index; **BP**: blood pressure; **HDL-C**: high-density lipoprotein cholesterol; **MetS**: metabolic syndrome **n**: sample size included in analysis; **SD**:

124 standard

deviation;

**WC**:

waist

circumference

---

125 3.3.4 *Obesity-related outcomes*

126 *High-income countries*

127 11 studies reported on obesity-related outcomes. A study reporting on BMI did not find any association before the age  
128 of 5. BMI from 5y onwards was associated with overweight/obesity in females whilst this association in males was  
129 seen from age 8y onwards [46].

130 Angbratt et al. found a small correlation with PI at birth, 1.5y, and BMI at 2.5y ( $r<0.5$ ) and overweight/obesity at  
131 follow-up whilst BMI at age 5, 7 and 10y was strongly correlated with BMI at follow-up ( $r>0.5$ ) [29]. Another study  
132 found that a linear relationship with BMI at ages 0-5y was associated with higher BMI and waist circumference (WC)  
133 at follow-up [38].

134 One study reported that an increased BMI from 0-10y was associated with elevated WC at follow-up ( $p<0.001$ )  
135 [36]. Similarly, a study reported that obese subjects at follow-up had a high BMI between 0-12y (all  $p<0.001$ ). The  
136 researchers also found that females and males with a  $PI<18.5$  at birth had increased odds of becoming obese adults vs  
137 those with a  $PI>18.5$  (OR3 and OR4, respectively) [32]. Similarly, another study found that subjects with abdominal  
138 obesity had an increased BMI gain from infancy to follow-up versus those without abdominal obesity[31].

139 A study reporting on accelerated annual change in BMI SDS found that an annual change of  $\geq 0.2$  to  $<2.0$  BMI  
140 SDS in children 2-6y increased their risk of overweight/obesity later in life vs children with a stable BMI between age  
141 2-6y (RR1.43; CI1.35-1.49) [35].

142 One study reported on infant BMI only and found that a 1 unit increase in infant BMI z-score was associated with  
143 high BMI at 20y ( $\beta=0.70$ ; CI0.31-1.09;  $p<0.001$ ) and high DXA-measured fat-free mass index (FFMI) at 20y ( $\beta=0.75$ ;  
144 CI0.37-1.12; $p<0.001$ ) and 30y ( $\beta=0.34$ ; CI0.12-0.56). They found no association between infant BMI and body  
145 composition after age 30 [44].

146 Golab et al. reported on different adiposity measures using skinfolds and found that an increased central-to-total  
147 fat mass (FM) ratio at 1.5mo and increased total subcutaneous FM at 6 months and 2 y was associated with higher  
148 BMI and fat mass index (FMI) at follow-up [37]. Similarly, another study reported that females who had a steep  
149 increase in BMI the first year of life had higher DXA-measured FMI at follow-up. There was no association in males  
150 [45].

151 The Norwegian study showed that females who were overweight/obese at 2.5y had increased odds of a higher  
152 FMI measured by DXA at follow-up vs those with a normal weight at 2.5y (OR:2.00;  $p<0.05$ ), however, the association  
153 was stronger with overweight/obesity at 6y and increased WC at follow-up vs normal weight at 6y (OR:4.79;  $p<0.001$ ).  
154 In males there was no association between overweight/obesity at age 2.5 and obesity-related outcomes at follow up;  
155 however overweight/obesity at 6y was associated with increased odds of increased WC (OR:5.56; $p<0.001$ ) and DXA-  
156 measured FMI (OR:4.14;  $p<0.001$ ) at follow-up [34].

157

158 *Low- and middle-income countries*

159 A Guatemalan study found an association between BMI at birth and BMI ( $\beta=0.33$ ; $p<0.05$ ) and fat-free mass (FFM)  
160 ( $\beta=0.49$ ; $p<0.01$ ) at follow-up. FFM was estimated using predictive equations from hydrostatic weight measurements in  
161 a similar population. Results also showed that BMI at 0-1y and 3-7y was associated with BMI, FFM, percentage body  
162 fat (PBF) and abdominal circumference (AC), and that changes in BMI from 3-7y were most strongly associated with  
163 adult FM and AC (see Appendix B for details). There was no association between BMI at ages 1-3y and measured  
164 outcomes at follow-up [28].

165 A similar study in India found a correlation between BMI in childhood and BMI at follow-up; correlation  
166 strengthened with age (6mo:  $r=0.19$ , 2y:  $r=0.24$ , 5y:  $r= 0.32$ , 14y:  $r=0.65$ ). The study reported that PI at birth was

---

167 associated with FFM in adulthood and that BMI in infancy and early childhood correlated more strongly with adult  
168 FFM whilst increased BMI in late childhood and adolescence was associated with adult FM. FFM and FM were  
169 derived from skinfolds [54].

170 Another Indian study reported an association between fat gain from 0-6y and waist-hip ratio, BMI and PBF at  
171 follow-up. In addition, the results showed that greater lean tissue gain from 2-5y and 0-13.5y was associated with SF  
172 thickness and BMI at follow-up, respectively. FM, FFM and PBF were derived from skinfolds up to age 5 whereafter  
173 researchers used bioelectrical impedance analysis [52].

174 **Table 5.** Summary of studies reporting on obesity-related outcomes.

| Author (year)         | Sample size                        | Type of Exposure | Age at Outcome Assessment (mean age in years) | Obesity-related outcomes                                                                                                                                                                                                                                                                                                                                                                                                                                                           |
|-----------------------|------------------------------------|------------------|-----------------------------------------------|------------------------------------------------------------------------------------------------------------------------------------------------------------------------------------------------------------------------------------------------------------------------------------------------------------------------------------------------------------------------------------------------------------------------------------------------------------------------------------|
| High-income countries |                                    |                  |                                               |                                                                                                                                                                                                                                                                                                                                                                                                                                                                                    |
| Angbratt (2011) [29]  | 3579                               | BMI, PI          | ~15 (14.5)                                    | Moderate/small correlations was found between PI at birth, 1.5y and BMI at 2.5y with BMI at 15y ( $r < 0.5$ ).                                                                                                                                                                                                                                                                                                                                                                     |
| Barker (2005) [30]    | 444<br>(clinical subset<br>n=2003) | BMI, PI          | ~37-64 (n/r)                                  | Strong correlation between BMI at 5y, 7y, 10y with aBMI<br>Moderate/small correlations was found between PI at birth, 1.5y and BMI at 2.5y with BMI at 15y ( $r < 0.5$ ).                                                                                                                                                                                                                                                                                                          |
| East (2020) [31]      | 1000                               | BMI              | ~23 (n/r)                                     | Strong correlation between BMI at 5y, 7y, 10y with aBMI<br>Abdominal obesity was assessed, and SP was divided into "risk present" and "risk absent" cluster according to their results. Trajectories of BMI were then analysed separately for each group.<br><br>↑ BMI (6mo-23 y) in subjects with abdominal obesity<br><br>Results are presented as "risk present vs risk absent":<br><i>slope 6mo-5y: 0.05 vs -0.17, intercept 5y: 18.12 vs 16.25, slope 5-23y: 4.20 vs 2.70</i> |
| Eriksson (2003) [32]  | 444<br>(clinical subset<br>n=2003) | BMI, PI          | ~56-66 (n/r)                                  | Obesity was assessed, and SP was divided into "obese" and "non-obese" cluster according to their results. Trajectories of BMI and PI were then analysed separately for each group.<br><br>↑ BMI (0-12y) in obese adults vs non-obese<br><br><u>Females:</u><br>↑ Prevalence of BMI>30 in adults with a PI>18.5 at birth vs                                                                                                                                                         |

|                      |       |                    |               |                                                                                                                                                                                                                                                                                                                                                                                                                                                                                                                    |
|----------------------|-------|--------------------|---------------|--------------------------------------------------------------------------------------------------------------------------------------------------------------------------------------------------------------------------------------------------------------------------------------------------------------------------------------------------------------------------------------------------------------------------------------------------------------------------------------------------------------------|
|                      |       |                    |               | those with a PI<18.5                                                                                                                                                                                                                                                                                                                                                                                                                                                                                               |
|                      |       |                    |               | <p><u>Males:</u><br/>           ↑Prevalence of BMI&gt;30 in adults with a PI&gt;18.5 at birth vs those with a PI&lt;18.5</p> <p><u>Females:</u><br/>           ↑Odds of higher aFMI (by DXA) in overweight/obese children (2.5y) vs normal weight</p> <p>↑Odds of higher aWC in overweight/obese children (6y) vs normal weight</p>                                                                                                                                                                                |
| Evensen (2019) [34]  | 907   | BMI                | ~15-20 (n/r)  |                                                                                                                                                                                                                                                                                                                                                                                                                                                                                                                    |
|                      |       |                    |               | <p><u>Males:</u><br/>           ↑Odds of higher aWC and aFMI (by DXA) in overweight/obese children (6y) vs normal weight</p> <p>Accelerated annual change in BMI SDS (<math>\geq 0.2</math> to <math>&lt;2.0</math>) in children 2-6y associated with overweight/obesity at 18y</p> <p>WC, sBP, dBP, total glucose, TG, HDL-C, LDL-C were assessed and SP was divided into "with Mets" and "without Mets" according to their results. Trajectories of BMI and WC were then analysed separately for each group.</p> |
| Geserick (2018) [35] | 34196 | BMI                | ~18 (n/r)     |                                                                                                                                                                                                                                                                                                                                                                                                                                                                                                                    |
| Giudici (2017) [36]  | 1919  | BMI                | ~20-60 (30.7) |                                                                                                                                                                                                                                                                                                                                                                                                                                                                                                                    |
|                      |       |                    |               | <p>↑ aWC associated with higher BMI (0-10y)</p> <p>In infancy skinfold thicknesses were used as a measure of adiposity whilst at age 10 FM was measured using a DXA scanner.</p> <p>↑Central-to-total FM ratio (1.5mo) associated with higher BMI, FMI, subcutaneous FMI at 10 y</p> <p>↑Total subcutaneous FM (6mo, 2y) associated with higher BMI, FMI, subcutaneous FM at 10 y</p> <p>No association between exposure and visceral fat,</p>                                                                     |
| Golab (2018) [37]    | 593   | Skinfold thickness | ~10 (n/r)     |                                                                                                                                                                                                                                                                                                                                                                                                                                                                                                                    |

|                                  |                                                        |     |               |                                                                                                                                                                                                                                                                                                                                                                                                                                                                                                                 |
|----------------------------------|--------------------------------------------------------|-----|---------------|-----------------------------------------------------------------------------------------------------------------------------------------------------------------------------------------------------------------------------------------------------------------------------------------------------------------------------------------------------------------------------------------------------------------------------------------------------------------------------------------------------------------|
| Graversen (2014) [38]            | 2120                                                   | BMI | ~31 (n/r)     | pericardial fat and liver fat at 10 y<br>Linear relationship with BMI (0-5y) associated with $\Delta$ BMI and $\Delta$ WC                                                                                                                                                                                                                                                                                                                                                                                       |
| Johnson (2017) [44]              | 350                                                    | BMI | ~20-60 (n/r)  | $\hat{\mu}$ BMI (20y) and DXA-measured FFMI (20y, 30y) with 1 unit increase in infant BMI Z-score                                                                                                                                                                                                                                                                                                                                                                                                               |
| Kwon (2017) [45]                 | 1093<br>(clinical subset<br>at 8y n=495,<br>19y n=314) | BMI | ~8, 19 (n/r)  | No associations between infant BMI and DXA-measured FFMI after age 30<br>Trajectories of BMI were analysed, trends were identified, SP was divided into “consistently low BMI in childhood” (group 1), “steep increase in BMI second year of life” (group 2), “steep increase in BMI the first year of life” (group 3), “consistently high BMI in childhood” (group 4). FMI at age 8 and 19 were derived using DXA scans.<br><br><u>Females:</u><br>$\hat{\mu}$ FMI (8y, 19y) in group 3 and 4 vs group 1 and 2 |
| Lagström (2008) [46]             | 541                                                    | BMI | ~13 (n/r)     | <u>Males:</u> no statistical association.<br>Overweight/obesity was assessed, SP was divided into “overweight/obese” and “normal”. Trajectories of BMI were then analysed separately for each group. All results are in overweight/obese vs normal children.<br><br><u>Females:</u><br>$\hat{\mu}$ BMI (5y onwards) associated with overweight/obesity<br><br><u>Males:</u><br>$\hat{\mu}$ BMI (8y onwards) associated with overweight/obesity                                                                  |
| Low- and middle-income countries |                                                        |     |               |                                                                                                                                                                                                                                                                                                                                                                                                                                                                                                                 |
| Corvalán (2007) [28]             | 710                                                    | BMI | ~33-35 (32.7) | FFM and PBF were estimated using predictive equations from hydrostatic weight measurements in a similar                                                                                                                                                                                                                                                                                                                                                                                                         |

| Author (Year) [Ref]     | n    | Measure                 | Sample Size  | Findings                                                                                                                                                                                                                                                                                                                                                                                                                                                                                                                                                                                                                                                                                                                                                                                         |
|-------------------------|------|-------------------------|--------------|--------------------------------------------------------------------------------------------------------------------------------------------------------------------------------------------------------------------------------------------------------------------------------------------------------------------------------------------------------------------------------------------------------------------------------------------------------------------------------------------------------------------------------------------------------------------------------------------------------------------------------------------------------------------------------------------------------------------------------------------------------------------------------------------------|
| Krishnaveni (2015) [52] | 414  | BMI, skinfold thickness | ~13.5 (n/r)  | <p>population</p> <p>↑ aBMI, FFM associated with BMI (at birth)</p> <p>↑ aBMI, FFM, PBF, AC associated with BMI (0-1y and 3-7y)</p> <p>- changes in BMI between 3-7y were more strongly associated with FM and AC in adulthood than with FFM</p> <p>No association between BMI at 1-3y and outcomes</p> <p>At age 0-5y adiposity was derived from skinfolds and from 10y onwards researchers used bioelectrical impedance analysis.</p> <p>↑ FM at birth and fat gain during infancy and childhood associated with BMI and SF at follow-up.</p> <p>↑ WHR and PBF associated with fat gain (0-6y).</p> <p>↑ aSF thickness associated with greater lean tissue gain (2-5y).</p> <p>↑ aBMI associated with greater lean tissue gain (0-13.5y).</p> <p>Adiposity measures derived from skinfolds</p> |
| Sachdev (2005) [54]     | 1526 | BMI                     | ~26-32 (n/r) | <p>↑ Childhood BMI correlated with aBMI (correlation strengthened with age)</p> <p>PI at birth associated with lean residual</p> <p>↑ BMI at birth associated with high aBMI and lean residual BMI in infancy and early childhood correlated more strongly with aFFM than with aFM</p> <p>↑ BMI in late childhood and adolescence associated with ↑ aFM</p>                                                                                                                                                                                                                                                                                                                                                                                                                                      |

175 Notes: ↑= increased; ↓=decreased.

176 Abbreviations: a: adult ; **BMI**: body mass index; **FM**: fat mass; **FFMI**: fat-free mass index; **FM**: fat mass; **FMI**: fat mass index; **n**: sample size included in analysis; **PI**: ponderal

177 index; **SD**: standard deviation; **SF**: skinfold; **WC**: waist circumference



---

## 178 4. Discussion

### 179 4.1 Summary

180 The major finding from our review is that evidence on childhood body composition and later life NCD is severely  
181 limited. Though four studies assessed skinfold thickness in childhood, we did not find any using the more direct and  
182 technically superior methods such as isotope dilution, plethysmography or X-ray. We did however find numerous  
183 studies using BMI (and a smaller number using Ponderal Index) - but it is important to note that these are only proxy  
184 measures of body composition. Even with BMI as the childhood exposure variable, associations with later NCD are  
185 difficult to interpret due to marked inter-study heterogeneity, especially in terms of NCD measure and age at follow-  
186 up. Varied approaches to analysing, reporting and presenting data add to the challenge of interpreting what is. Most  
187 studies showed that childhood BMI is associated with later-life cardiometabolic NCD risk and that changes in BMI  
188 rather than absolute BMI, appears to be important. Some studies also showed sex-specific differences. Most studies  
189 were unadjusted for current body size and thus the independent effect of childhood BMI is open to question. Because  
190 most studies were from high-income settings, wider generalizability to populations in low- and middle-income  
191 settings is unknown.

192

### 193 4.2 Interpretation of findings

194 Most of our interpretable data uses BMI as the childhood exposure variable. BMI is widely used to categorize  
195 nutritional status because it is simple and can be compared with reference standards [57]. Many people and even  
196 many non-specialist scientists/clinicians also view it as “an indicator of body fatness”[58] – hence why it was so  
197 common in our search results. It is however just an indicator of excess or inadequate weight, not excess or inadequate  
198 fat mass (FM) and it cannot differentiate between FM and fat-free mass (FFM). The perception about “fatness” arises  
199 because of an association between BMI and FM in adulthood especially, but in children, this is influenced by variety  
200 of other factors such as age, sex, pubertal status, and ethnicity. In relation to using BMI as an indicator of bodyfat in  
201 early life, another big limitation arises: specifically, that low BMI at birth and during infancy can act as a proxy for low  
202 FFM [8], and hence as a marker of poor capacity for metabolic homeostasis [59]. This is highly problematic as this  
203 implies that greater relative weight indexes different things at different time points. Although several studies in this  
204 review have shown that infant weight gain is protective of NCDs in later life and that both low BMI at birth and in  
205 infancy *and* high childhood BMI is associated with an increased risk of NCDs, the lack of information about the  
206 relationship between BMI and body composition makes it difficult to interpret the data and establish clear  
207 associations. Infancy is a particularly challenging period to investigate, as low BMI may indicate low FFM, whereas  
208 rapid BMI increases over time may indicate fat deposition through catch-up growth [59].

209 In the studies that did differentiate between FM and FFM, low BMI in infancy and high BMI in childhood both  
210 predicted later NCD risk. This pattern links with the ‘capacity-load model’ which hypothesizes that increased size at  
211 birth indicates a greater metabolic (homeostatic) capacity, although those born in the highest weight-categories may  
212 deviate from this pattern since a higher proportion of their weight is likely due to adipose tissue, which imposes a  
213 metabolic load [18,60].

214

215

216 Several studies have associated birth weight and BMI in infancy with adult FFM, whilst BMI in later childhood was  
217 associated with both FM and FFM [61–63]. This is consistent with studies included in this review. Four studies found  
218 that early BMI was associated with adult FFM whilst BMI in later childhood was associated with FM and FFM

---

219 [28,34,64,65]. These were also the only studies distinguishing between FM and FFM while the rest of the studies  
220 reported on BMI as a whole. As BMI does not distinguish between FM and FFM, associations between early BMI and  
221 overweight/obesity are likely to be confounded by the gain in FFM, thus are a threat to the validity of its use. This  
222 might also explain, why some studies did find an association between BMI and NCDs, while others did not.

223 Other inconsistencies of our results among studies reporting on the same outcome measure can be explained by  
224 the follow-up time of the respective studies. In our review, years of follow-up varied widely from 10-70y. In studies  
225 with relatively short follow-up time that show no association between exposure and outcome, it is likely that some  
226 subjects will go on to develop a NCD with time as most NCDs do not develop until later in life [66–68]. T2D, for  
227 instance, is most commonly seen in people over the age of 45 [68], and only 1/3 studies in current review with T2D as  
228 an outcome, had a study population above age 45 [33].

229 Lack of adjusting for current body size also impacts interpretation of our findings. In 1999, Lucas et al. criticized  
230 researchers' lack of understanding and communication of the statistical implications of this. Over 20 years later, our  
231 review suggests that the problem remains. Adjustment for current size is important because it implies that change in  
232 size as well as initial size can contribute to an association [69]. Previous reviews found that studies which had  
233 adjusted for current body size experienced a partial attenuation in effect size [70] and that some associations  
234 completely disappeared after adjustment for current body size [71]. These discoveries show that studies that fail to  
235 undertake these adjustments may be confounded by adult body size, and therefore the observed associations might in  
236 fact reflect the tracking of childhood BMI across the lifespan instead of an actual association [72].

237 In our review, 11 of 29 studies adjusted for current body size [27,30,56,40,41,44,48–51,53] and like previously  
238 reported, some associations attenuated or became statistically insignificant after adjustments or even reversed.  
239 However, while the researchers did comment on the effect adjustment for body size had on the results, most of the  
240 studies did not report both adjusted vs unadjusted results in respect to adjustment for current body size, making  
241 readers unable to analyse and interpret raw data to draw their own conclusions.

242

#### 243 *4.3 Research in context*

244 Similar to our review, Park et al. found an association between childhood overweight (2-12y), unadjusted for adult  
245 body size, and CVD outcomes in adulthood. They were unable to conclude that childhood overweight is an  
246 independent risk factor of adult CVD as the few studies that did report adjusted results, were inconclusive.  
247 Furthermore, studies were mainly from high-income settings and thus the generalizability is limited [24]. In contrast,  
248 a review from Owen et al. in 2009 concluded, that BMI gain from age 2-6 had a weak inverse association (RR0.94,  
249 95%CI:0.82-1.07) with CHD risk [73]; however statistical findings are weak with crossing CIs. It is also important to  
250 notice that this conclusion was based on only 3 estimates and that the researchers for this review did not exclude  
251 cohorts with high-risk subjects (e.g. LBW babies). Owen et al. also reported that the inverse association between  
252 childhood BMI and CHD risk became weakly positive after age 7y and grew stronger with age [73]. The inverse  
253 association is consistent with some studies included in the current review that found an association between low BMI  
254 in infancy and NCD risk factors in adulthood. The evidence supports the capacity-load model hypothesis [74], where  
255 LBW means lower capacity, but an excessively high birthweight, likewise, also means lower capacity in terms of  
256 ability of metabolically coping with NCDs. Results from a number of studies in the current review suggest the same  
257 trend but whether this is due to the uncontrolled adjustments for current body size remains unanswered.

258 A review by Simmonds et al. based on HIC studies, reported that BMI has poor sensitivity in identifying healthy-  
259 weight children, who later would become obese adults. However, BMI was found to be a reasonable accurate measure  
260 of obesity and thus can identify obese children who most likely will become obese adults. The researchers also

261 reported that obese children had more than five times the risk of becoming obese adults than non-obese children  
262 (RR5.21; 95%CI4.50-6.02) [21]. These findings are consistent with studies we found, which suggest a pattern whereby  
263 increased BMI at different ages throughout childhood is associated with NCD/obesity-related outcomes in adult life.  
264 Simmonds et al. also found that BMI was a poor predictor of obesity-related diseases, as only 40% of adult diabetes  
265 and 20% of CHD would occur in overweight/obese children [21]. This further underlines the importance of using  
266 better body composition measurements in future studies, to examine the effect of childhood fat mass and fat-free mass  
267 on adult NCDs.

268 These three reviews also experienced challenges with the diversity in reporting, which for Simmonds et al. meant  
269 that a number of assumptions were made to conduct the meta-analysis and thus the reliability of the pooled estimate  
270 may be limited [21]. Due to the limitations of these review, results should be interpreted as a general trend rather than  
271 a precise estimate of an association or predictive accuracy.

272 Finally, a 2021 review focused on NCD risk in survivors of childhood *undernutrition/famine* [15]. Though the  
273 exposure was to undernutrition (as assessed by standard anthropometric measures) and thus the opposite type of  
274 malnutrition to most studies in this review, authors also found an association with numerous NCD-related outcomes.  
275 Strength and consistency of association also varied according to outcome. Interpreting the reviews together, it seems  
276 that extremes at both ends of the malnutrition spectrum risk long term adverse outcomes. Our observation that rate of  
277 weight change can mediate risk might offer insights into mechanism spanning the two types of malnutrition. As that  
278 review highlights in the conclusions, this work on mechanisms is urgently needed.

279

#### 280 4.4 Limitations

281 All included studies controlled for some known confounders. However, all studies were also of observational design,  
282 and there is therefore an inherent risk of residual confounding affecting the results. Whilst it is impossible to control  
283 for all confounders, the most evident and important confounders should be taken into consideration. For example,  
284 Bhargava et al. did not adjust for socio-economic status (SES) [50]. SES is a well-known confounder and lack of  
285 controlling thereof may lead to significantly affected and incorrect effect size [75]. Though not simple, it might also  
286 have been possible to control for different times of follow-up e.g. using age-standardized reporting of NCD-related  
287 outcome measures.

288 As mentioned, very few studies reported on actual body composition in relation to NCDs which consequently  
289 highly limits our understanding of how FM and FFM in early childhood relates to later NCD risk. Alongside the  
290 problem of using BMI rather than other true measures of body composition, adjustment for current body size was a  
291 major limitation in this review. Since under half of the studies included in the narrative synthesis adjusted for current  
292 size, we are unable to confirm the independent effect of early childhood body size on long-term cardiometabolic  
293 health, and thus there is a possibility that the associations seen in studies that failed to undertake these adjustments, is  
294 mediated through adult body size.

295 Several studies were greatly affected by loss to follow-up and only four had an attrition rate below 20%  
296 [28,34,49,52]. Seven studies reported a loss to follow-up above 60% of the original cohort [40–42,48,53,55,65], while  
297 eight did not address attrition rate at all nor did they report it [29,30,32,33,45–47,56].

298 None of the studies presented power calculations for their sample size, and only four studies [31,41,47,53]  
299 identified reduced power as a limitation of their study and possible explanation for the lack of weak  
300 association/difference in groups.

301

## 302 5. Research recommendations

303 This review has highlighted several areas needing urgent research attention.

304 Heterogeneity among future studies might be reduced by researchers reading our review when planning their  
305 own work and choosing outcome variables / measurement timings which can then be more directly compared with  
306 this past work. Checklists of key items to report in such nutrition/NCD follow-up studies might also help, forming the  
307 basis for a STROBE checklist extension [76].

308 Based on the risk of bias assessment, it is recommended that future longitudinal studies improve their reporting  
309 on several potential sources of bias and include a flow diagram to demonstrate their participation and response rates.  
310 In particular, follow-up rates should be reported as well as implications clearly discussed.

311 BMI is a poor measure of adiposity as it does not distinguish between FM and FFM. Future work should use  
312 additional, more direct measures of adiposity, e.g. peapod, isotope dilution, DXA. These studies urgently needed and  
313 could offer valuable insights into mechanisms linking early life malnutrition (both undernutrition and  
314 overweight/obesity) with later life NCD risk. Studies are also needed to explore the relative utility of different  
315 methods: e.g. which field-appropriate measures (such as BIA) are most closely associated with the more complex,  
316 costly but arguably more 'gold standards' measures such as DEXA scans.

317 Finally, less than half of studies in this review adjusted for current body size. Future studies should present both  
318 crude and adjusted associations.

## 319 6. Conclusion

320 Our review found that early life nutritional status, mostly as assessed by low BMI in infancy and increased BMI in  
321 later childhood, was often associated with increased risk of cardiometabolic diseases and risk factors in adult life.  
322 Although exact patterns of association varied in different studies and settings (i.e. whether absolute BMI or BMI  
323 change in childhood matter most), some evidence in our review suggest a pattern where low BMI at birth and infancy  
324 followed by a rapid weight gain in childhood exceeding recommended levels increases the risk of NCDs. Whether  
325 different patterns of body composition mediate or explain some of these variations is not possible to say. Neither is it  
326 known whether childhood BMI is an independent risk factor for NCDs in adulthood, or whether the association  
327 simply is mediated through adult overweight/obesity. Due to the limited evidence on nutritional status measures  
328 other than BMI, it is not possible to identify which measure of body composition best predicts NCDs in adulthood.

329 We highlight several gaps in literature: high quality evidence on this topic - in particular evidence from low- and  
330 middle-income countries and; the use of more direct measures of body composition to better describe nutritional  
331 status. As technology is rapidly improving, better equipment/solutions are more accessible and can provide research  
332 with adequate measures of body composition. Findings from our review underline the necessity to improve and  
333 continue the tracking of body composition from birth to adulthood to help understand relevant mechanisms linking  
334 child nutrition to adult health/NCD. This has a key role to play in preventing the increasing rates of  
335 overweight/obesity among children and adults and ultimately prevent the rising prevalence of NCDs.

336

337 **Supplementary Materials:** The following are available online at [www.mdpi.com/xxx/s1](http://www.mdpi.com/xxx/s1): None.

338 **Author Contributions:** Conceptualization, M.K. and A.B.; methodology, M.K. and A.B.; formal analysis, A.B.; investigation, A.B.  
339 and I.G.; resources, writing—original draft preparation, A.B.; writing—review and editing, A.B., M.K., J.C.K.W., A.J.M., V.O.O.,  
340 C.U.L. visualization, A.B.; supervision, M.K.; project administration, A.B.; funding acquisition, M.K. All authors have read and  
341 agreed to the published version of the manuscript. Please turn to the [CRediT taxonomy](https://creativecommons.org/licenses/by-nc-nd/4.0/) for the term explanation. Authorship must  
342 be limited to those who have contributed substantially to the work reported.

343 **Funding:** MK thanks the Medical Research Council, UK for time on this work (CHANGE project: Child malnutrition & Adult  
344 NCD: Generating Evidence on mechanistic links to inform future policy/practice (UKRI GCRF Grant Ref: MR/V000802/1)

345 **Acknowledgments:** In this section you can acknowledge any support given which is not covered by the author contribution or  
346 funding sections. This may include administrative and technical support, or donations in kind (e.g., materials used for  
347 experiments).

348 **Conflicts of Interest:** The authors declare no conflict of interest.

---

349 **Appendix A**

350 Full search strategy.

351 Database: Ovid MEDLINE(R) and In-Process & Other Non-Indexed Citations and Daily <1946 to July 27, 2020>

352 Search Strategy:

353 -----

354 1. (diabetes type 2 or type 2 diabetes or diabetes mellitus or insulin resistance syndrome\* or insulin resistan\* or  
355 hyperglycaemia or hypertension or arteriosclerosis or cardiovascular disease\* or cardio vascular disease\* or blood  
356 pressure or coronary heart disease\* or metabolic syndrome\* or dysmetabolic syndrome\* or cardio metabolic disorder\*  
357 or

358 cardiometabolic disorder\* or lipid profile or lipid metabolism or lipid\* profile or glucose metaboli\* disorder\* or  
359 glucose intoleran\* or glucose toleran\* or obes\* or artheroscleros\*).mp. (1781365)

360 2. ((infan\* or baby or babies or child\* preschool or preschool child or early childhood or young children or  
361 kindergarten\* or children under 5 or children under five or under 5's) adj10 (body composition or body fat or fat  
362 percentage or fat % or lean mass or fat mass of fat free mass or muscle mass or grip strength or hand strength or  
363 antropometr\* or skinfold or skinfold thickness or body mass index or BMI or percent fat or fat percent or  
364 densitometry)).mp. (5242)

365 3. 1 and 2 (2221)

366 4. ((infan\* or baby or babies or child\* preschool or preschool child or early childhood or young children or  
367 kindergarten\* or children under 5 or children under five or under 5's) adj10 (body composition or body fat or fat  
368 percentage or fat % or lean mass or fat mass of fat free mass or muscle mass or grip strength or hand strength or  
369 antropometr\* or skinfold or skinfold thickness or body mass index or BMI)).mp. [mp=title, abstract, original title,  
370 name

371 of substance word, subject heading word, floating sub-heading word, keyword heading word, organism  
372 supplementary concept word, protocol supplementary concept word, rare disease supplementary concept word,  
373 unique identifier, synonyms] (5194)

374 5. 1 and 4 (2219)

375 6. body [composition.mp](#). [mp=title, abstract, original title, name of substance word, subject heading word, floating  
376 sub-heading word, keyword heading word, organism supplementary concept word, protocol supplementary concept  
377 word, rare disease supplementary concept word, unique identifier, synonyms] (57816)

378 7. body [fat.mp](#). [mp=title, abstract, original title, name of substance word, subject heading word, floating sub-  
379 heading word, keyword heading word, organism supplementary concept word, protocol supplementary concept  
380 word, rare disease supplementary concept word, unique identifier, synonyms] (33004)

381 8. (fat percentage or fat %).mp. [mp=title, abstract, original title, name of substance word, subject heading word,  
382 floating sub-heading word, keyword heading word, organism supplementary concept word, protocol supplementary  
383 concept  
384 word, rare disease supplementary concept word, unique identifier, synonyms] (271026)

385 9. fat [mass.mp](#). [mp=title, abstract, original title, name of substance word, subject heading word, floating sub-  
386 heading word, keyword heading word, organism supplementary concept word, protocol supplementary concept  
387 word, rare disease supplementary concept word, unique identifier, synonyms] (20698)

388 10. lean [mass.mp](#). [mp=title, abstract, original title, name of substance word, subject heading word, floating sub-  
389 heading word, keyword heading word, organism supplementary concept word, protocol supplementary concept

---

390 word, rare disease supplementary concept word, unique identifier, synonyms] (5400)  
391 11. fat free [mass.mp](#). [mp=title, abstract, original title, name of substance word, subject heading word, floating sub-  
392 heading word, keyword heading word, organism supplementary concept word, protocol supplementary concept  
393 word, rare disease supplementary concept word, unique identifier, synonyms] (7537)  
394 12. muscle [mass.mp](#). [mp=title, abstract, original title, name of substance word, subject heading word, floating sub-  
395 heading word, keyword heading word, organism supplementary concept word, protocol supplementary concept  
396 word, rare disease supplementary concept word, unique identifier, synonyms] (17698)  
397 13. grip [strength.mp](#). [mp=title, abstract, original title, name of substance word, subject heading word, floating sub-  
398 heading word, keyword heading word, organism supplementary concept word, protocol supplementary concept  
399 word, rare disease supplementary concept word, unique identifier, synonyms] (11357)  
400 14. hand [strength.mp](#). [mp=title, abstract, original title, name of substance word, subject heading word, floating sub-  
401 heading word, keyword heading word, organism supplementary concept word, protocol supplementary concept  
402 word, rare disease supplementary concept word, unique identifier, synonyms] (15132)  
403 15. anthropometr\*.mp. [mp=title, abstract, original title, name of substance word, subject heading word, floating  
404 sub-heading word, keyword heading word, organism supplementary concept word, protocol supplementary concept  
405 word, rare disease supplementary concept word, unique identifier, synonyms] (78466)  
406 16. (skinfold or skin fold thickness).mp. [mp=title, abstract, original title, name of substance word, subject heading  
407 word, floating sub-heading word, keyword heading word, organism supplementary concept word, protocol  
408 supplementary concept word, rare disease supplementary concept word, unique identifier, synonyms] (10959)  
409 17. (body mass index or BMI).mp. [mp=title, abstract, original title, name of substance word, subject heading word,  
410 floating sub-heading word, keyword heading word, organism supplementary concept word, protocol supplementary  
411 concept word, rare disease supplementary concept word, unique identifier, synonyms] (279689)  
412 18. 6 or 7 or 8 or 9 or 10 or 11 or 12 or 13 or 14 or 15 or 16 or 17 (608903)  
413 19. (infan\* adj10 #13).mp. [mp=title, abstract, original title, name of substance word, subject heading word, floating  
414 sub-heading word, keyword heading word, organism supplementary concept word, protocol supplementary concept  
415 word, rare disease supplementary concept word, unique identifier, synonyms] (4182)  
416 20. ((baby or babies) adj10 #13).mp. [mp=title, abstract, original title, name of substance word, subject heading  
417 word, floating sub-heading word, keyword heading word, organism supplementary concept word, protocol  
418 supplementary concept word, rare disease supplementary concept word, unique identifier, synonyms] (551)  
419 21. ((child\* preschool or preschool child) adj10 #13).mp. [mp=title, abstract, original title, name of substance word,  
420 subject heading word, floating sub-heading word, keyword heading word, organism supplementary concept word,  
421 protocol supplementary concept word, rare disease supplementary concept word, unique identifier, synonyms] (2)  
422 22. (early childhood adj10 #13).mp. [mp=title, abstract, original title, name of substance word, subject heading word,  
423 floating sub-heading word, keyword heading word, organism supplementary concept word, protocol supplementary  
424 concept word, rare disease supplementary concept word, unique identifier, synonyms] (60)  
425 23. (young children adj10 #13).mp. [mp=title, abstract, original title, name of substance word, subject heading word,  
426 floating sub-heading word, keyword heading word, organism supplementary concept word, protocol supplementary  
427 concept  
428 word, rare disease supplementary concept word, unique identifier, synonyms] (91)  
429 24. (kindergarten adj10 #13).mp. [mp=title, abstract, original title, name of substance word, subject heading word,  
430 floating sub-heading word, keyword heading word, organism supplementary concept word, protocol supplementary  
431 concept word, rare disease supplementary concept word, unique identifier, synonyms] (50)

- 432 25. ((children under 5 or children under five or under 5's) adj10 #13).mp. [mp=title, abstract, original title, name of  
433 substance word, subject heading word, floating sub-heading word, keyword heading word, organism supplementary  
434 concept word, protocol supplementary concept word, rare disease supplementary concept word, unique identifier,  
435 synonyms] (66)
- 436 26. 19 or 20 or 21 or 22 or 23 or 24 or 25 (4931)
- 437 27. (diabetes type 2 or type 2 diabetes or diabetes mellitus or insulin resistance syndrome\* or insulin resistan\* or  
438 hyperglycaemia or hypertension or arteriosclerosis or cardiovascular disease\* or cardio vascular disease\* or blood  
439 pressure or coronary heart disease\* or metabolic syndrome\* or dysmetabolic syndrome\* or cardio metabolic disorder\*  
440 or cardiometabolic disorder\* or lipid profile or lipid metabolism or lipid\* profile or glucose metaboli\* disorder\* or  
441 glucose intoleran\* or glucose toleran\* or obes\* or hypertension or artherosclerosis\*).mp. (1781365)
- 442 28. (diabetes type 2 or type 2 diabetes).mp. [mp=title, abstract, original title, name of substance word, subject  
443 heading word, floating sub-heading word, keyword heading word, organism supplementary concept word, protocol  
444 supplementary concept word, rare disease supplementary concept word, unique identifier, synonyms] (126496)
- 445 29. diabetes [mellitus.mp](#). [mp=title, abstract, original title, name of substance word, subject heading word, floating  
446 sub-heading word, keyword heading word, organism supplementary concept word, protocol supplementary concept  
447 word, rare  
448 disease supplementary concept word, unique identifier, synonyms] (433938)
- 449 30. insulin resistance syndrome\*.mp. [mp=title, abstract, original title, name of substance word, subject heading  
450 word, floating sub-heading word, keyword heading word, organism supplementary concept word, protocol  
451 supplementary concept word, rare disease supplementary concept word, unique identifier, synonyms] (1746)
- 452 31. insulin resistan\*.mp. [mp=title, abstract, original title, name of substance word, subject heading word, floating  
453 sub-heading word, keyword heading word, organism supplementary concept word, protocol supplementary concept  
454 word, rare disease supplementary concept word, unique identifier, synonyms] (98055)
- 455 32. [hyperglycaemia.mp](#). [mp=title, abstract, original title, name of substance word, subject heading word, floating  
456 sub-heading word, keyword heading word, organism supplementary concept word, protocol supplementary concept  
457 word, rare disease supplementary concept word, unique identifier, synonyms] (10223)
- 458 33. [hypertension.mp](#). [mp=title, abstract, original title, name of substance word, subject heading word, floating sub-  
459 heading word, keyword heading word, organism supplementary concept word, protocol supplementary concept  
460 word, rare disease supplementary concept word, unique identifier, synonyms] (485390)
- 461 34. [arteriosclerosis.mp](#). [mp=title, abstract, original title, name of substance word, subject heading word, floating  
462 sub-heading word, keyword heading word, organism supplementary concept word, protocol supplementary concept  
463 word, rare disease supplementary concept word, unique identifier, synonyms] (70980)
- 464 35. cardiovascular disease\*.mp. [mp=title, abstract, original title, name of substance word, subject heading word,  
465 floating sub-heading word, keyword heading word, organism supplementary concept word, protocol supplementary  
466 concept word, rare disease supplementary concept word, unique identifier, synonyms] (260492)
- 467 36. cardio vascular disease\*.mp. [mp=title, abstract, original title, name of substance word, subject heading word,  
468 floating sub-heading word, keyword heading word, organism supplementary concept word, protocol supplementary  
469 concept word, rare disease supplementary concept word, unique identifier, synonyms] (705)
- 470 37. blood [pressure.mp](#). [mp=title, abstract, original title, name of substance word, subject heading word, floating  
471 sub-heading word, keyword heading word, organism supplementary concept word, protocol supplementary concept  
472 word, rare disease supplementary concept word, unique identifier, synonyms] (442915)
- 473 38. coronary heart disease\*.mp. [mp=title, abstract, original title, name of substance word, subject heading word,



474 floating sub-heading word, keyword heading word, organism supplementary concept word, protocol supplementary  
475 concept word, rare disease supplementary concept word, unique identifier, synonyms] (50273)  
476 39. metabolic syndrome\*.mp. [mp=title, abstract, original title, name of substance word, subject heading word,  
477 floating sub-heading word, keyword heading word, organism supplementary concept word, protocol supplementary  
478 concept word, rare disease supplementary concept word, unique identifier, synonyms] (57036)  
479 40. dysmetabolic syndrome\*.mp. [mp=title, abstract, original title, name of substance word, subject heading word,  
480 floating sub-heading word, keyword heading word, organism supplementary concept word, protocol supplementary  
481 concept word, rare disease supplementary concept word, unique identifier, synonyms] (111)  
482 41. cardio metabolic disorder\*.mp. [mp=title, abstract, original title, name of substance word, subject heading word,  
483 floating sub-heading word, keyword heading word, organism supplementary concept word, protocol supplementary  
484 concept word, rare disease supplementary concept word, unique identifier, synonyms] (87)  
485 42. cardiometabolic disorder\*.mp. [mp=title, abstract, original title, name of substance word, subject heading word,  
486 floating sub-heading word, keyword heading word, organism supplementary concept word, protocol supplementary  
487 concept word, rare disease supplementary concept word, unique identifier, synonyms] (562)  
488 43. lipid\* [profile.mp](#). [mp=title, abstract, original title, name of substance word, subject heading word, floating sub-  
489 heading word, keyword heading word, organism supplementary concept word, protocol supplementary concept  
490 word, rare disease supplementary concept word, unique identifier, synonyms] (22957)  
491 44. lipid [metabolism.mp](#). [mp=title, abstract, original title, name of substance word, subject heading word, floating  
492 sub-heading word, keyword heading word, organism supplementary concept word, protocol supplementary concept  
493 word, rare disease supplementary concept word, unique identifier, synonyms] (99667)  
494 45. glucose metaboli\* disorder\*.mp. [mp=title, abstract, original title, name of substance word, subject heading  
495 word, floating sub-heading word, keyword heading word, organism supplementary concept word, protocol  
496 supplementary concept word, rare disease supplementary concept word, unique identifier, synonyms] (1189)  
497 46. glucose intoleran\*.mp. [mp=title, abstract, original title, name of substance word, subject heading word, floating  
498 sub-heading word, keyword heading word, organism supplementary concept word, protocol supplementary concept  
499 word, rare disease supplementary concept word, unique identifier, synonyms] (16545)  
500 47. glucose toleran\*.mp. [mp=title, abstract, original title, name of substance word, subject heading word, floating  
501 sub-heading word, keyword heading word, organism supplementary concept word, protocol supplementary concept  
502 word, rare disease supplementary concept word, unique identifier, synonyms] (59483)  
503 48. obes\*.mp. [mp=title, abstract, original title, name of substance word, subject heading word, floating sub-heading  
504 word, keyword heading word, organism supplementary concept word, protocol supplementary concept word, rare  
505 disease supplementary concept word, unique identifier, synonyms] (352263)  
506 49. artheroscleros\*.mp. [mp=title, abstract, original title, name of substance word, subject heading word, floating  
507 sub-heading word, keyword heading word, organism supplementary concept word, protocol supplementary concept  
508 word, rare disease supplementary concept word, unique identifier, synonyms] (149)  
509 50. 28 or 29 or 30 or 31 or 32 or 33 or 34 or 35 or 36 or 37 or 38 or 39 or 40 or 41 or 42 or 43 or 44 or 45 or 46 or 47 or  
510 48 or 49 (1781365)  
511 51. 26 and 50 (337)  
512 52. remove duplicates from 51 (334)  
513 53. (infan\* adj10 (body composition or body fat or fat percentage or fat % or lean mass or fat mass of fat free mass or  
514 muscle mass or grip strength or hand strength or antropometr\* or skinfold or skinfold thickness or body mass index  
515 or BMI)).mp. [mp=title, abstract, original title, name of substance word, subject heading word, floating sub-heading

516 word, keyword heading word, organism supplementary concept word, protocol supplementary concept word, rare  
517 disease supplementary concept word, unique identifier, synonyms] (3773)

518 54. ((baby or babies) adj10 (body composition or body fat or fat percentage or fat % or lean mass or fat mass of fat  
519 free mass or muscle mass or grip strength or hand strength or antropometr\* or skinfold or skinfold thickness or body  
520 mass index or BMI)).mp. [mp=title, abstract, original title, name of substance word, subject heading word, floating  
521 sub-heading word, keyword heading word, organism supplementary concept word, protocol supplementary concept  
522 word, rare  
523 disease supplementary concept word, unique identifier, synonyms] (312)

524 55. (baby adj10 (body composition or body fat or fat percentage or fat % or lean mass or fat mass of fat free mass or  
525 muscle mass or grip strength or hand strength or antropometr\* or skinfold or skinfold thickness or body mass index  
526 or BMI)).mp. [mp=title, abstract, original title, name of substance word, subject heading word, floating sub-heading  
527 word,  
528 keyword heading word, organism supplementary concept word, protocol supplementary concept word, rare disease  
529 supplementary concept word, unique identifier, synonyms] (131)

530 56. (babies adj10 (body composition or body fat or fat percentage or fat % or lean mass or fat mass of fat free mass  
531 or muscle mass or grip strength or hand strength or antropometr\* or skinfold or skinfold thickness or body mass  
532 index or BMI)).mp. [mp=title, abstract, original title, name of substance word, subject heading word, floating sub-  
533 heading word, keyword heading word, organism supplementary concept word, protocol supplementary concept  
534 word, rare disease supplementary concept word, unique identifier, synonyms] (190)

535 57. ((child\* preschool or preschool child) adj10 (body composition or body fat or fat percentage or fat % or lean  
536 mass or fat mass of fat free mass or muscle mass or grip strength or hand strength or antropometr\* or skinfold or  
537 skinfold thickness or body mass index or BMI)).mp. [mp=title, abstract, original title, name of substance word, subject  
538 heading word, floating sub-heading word, keyword heading word, organism supplementary concept word, protocol  
539 supplementary concept word, rare disease supplementary concept word, unique identifier, synonyms] (670)

540 58. (early childhood adj10 (body composition or body fat or fat percentage or fat % or lean mass or fat mass of fat  
541 free mass or muscle mass or grip strength or hand strength or antropometr\* or skinfold or skinfold thickness or body  
542 mass index or BMI)).mp. [mp=title, abstract, original title, name of substance word, subject heading word, floating  
543 sub-heading word, keyword heading word, organism supplementary concept word, protocol supplementary concept  
544 word, rare disease supplementary concept word, unique identifier, synonyms] (357)

545 59. (young children adj10 (body composition or body fat or fat percentage or fat % or lean mass or fat mass of fat  
546 free mass or muscle mass or grip strength or hand strength or antropometr\* or skinfold or skinfold thickness or body  
547 mass index or BMI)).mp. [mp=title, abstract, original title, name of substance word, subject heading word, floating  
548 sub-heading word, keyword heading word, organism supplementary concept word, protocol supplementary concept  
549 word, rare disease supplementary concept word, unique identifier, synonyms] (269)

550 60. (kindergarten\* adj10 (body composition or body fat or fat percentage or fat % or lean mass or fat mass of fat free  
551 mass or muscle mass or grip strength or hand strength or antropometr\* or skinfold or skinfold thickness or body mass  
552 index or BMI)).mp. [mp=title, abstract, original title, name of substance word, subject heading word, floating sub-  
553 heading word, keyword heading word, organism supplementary concept word, protocol supplementary concept  
554 word, rare disease supplementary concept word, unique identifier, synonyms] (74)

555 61. (children under 5 adj10 (body composition or body fat or fat percentage or fat % or lean mass or fat mass of fat  
556 free mass or muscle mass or grip strength or hand strength or antropometr\* or skinfold or skinfold thickness or body  
557 mass index or BMI)).mp. [mp=title, abstract, original title, name of substance word, subject heading word, floating

558 sub-heading word, keyword heading word, organism supplementary concept word, protocol supplementary concept  
559 word, rare disease supplementary concept word, unique identifier, synonyms] (3)  
560 62. (children under five adj10 (body composition or body fat or fat percentage or fat % or lean mass or fat mass of  
561 fat free mass or muscle mass or grip strength or hand strength or antropometr\* or skinfold or skinfold thickness or  
562 body mass index or BMI)).mp. [mp=title, abstract, original title, name of substance word, subject heading word,  
563 floating sub-heading word, keyword heading word, organism supplementary concept word, protocol supplementary  
564 concept word, rare disease supplementary concept word, unique identifier, synonyms] (2)  
565 63. (under 5's adj10 (body composition or body fat or fat percentage or fat % or lean mass or fat mass of fat free  
566 mass or muscle mass or grip strength or hand strength or antropometr\* or skinfold or skinfold thickness or body mass  
567 index or BMI)).mp. [mp=title, abstract, original title, name of substance word, subject heading word, floating sub-  
568 heading word, keyword heading word, organism supplementary concept word, protocol supplementary concept  
569 word, rare disease supplementary concept word, unique identifier, synonyms] (0)  
570 64. 53 or 54 or 57 or 58 or 59 or 60 or 61 or 62 or 63 (5194)  
571 65. 50 and 64 (2219)  
572 66. (diabetes type 2 or type 2 diabetes or diabetes mellitus or insulin resistance syndrome\* or insulin resistan\* or  
573 hyperglycaemia or hypertension or arteriosclerosis or cardiovascular disease\* or cardio vascular disease\* or blood  
574 pressure or coronary heart disease\* or metabolic syndrome\* or dysmetabolic syndrome\* or cardio metabolic disorder\*  
575 or cardiometabolic disorder\* or lipid profile or lipid metabolism or lipid\* profile or glucose metaboli\* disorder\* or  
576 glucose intoleran\* or glucose toleran\* or obes\* or artheroscleros\*).mp. (1781365)  
577 67. ((infan\* or baby or babies or child\* preschool or preschool child or early childhood or young children or  
578 kindergarten\* or children under 5 or children under five or under 5's) adj10 (body composition or body fat or fat  
579 percentage or fat % or lean mass or fat mass of fat free mass or muscle mass or grip strength or hand strength or  
580 anthropometr\* or skinfold or skinfold thickness or body mass index or BMI)).mp. (5194)  
581 68. 66 and 67 (2219)  
582 69. ((infant\* or baby or babies or child\* preschool or preschool child or early childhood or young children or  
583 kindergarten\* or children under 5 or children under five or under 5's) adj10 (percent fat or fat percent or  
584 densitometry)).mp. [mp=title, abstract, original title, name of substance word, subject heading word, floating sub-  
585 heading word, keyword heading word, organism supplementary concept word, protocol supplementary concept  
586 word, rare disease supplementary concept word, unique identifier, synonyms] (71)  
587 70. 67 or 69 (5242)  
588 71. 66 and 70 (2221)  
589 72. limit 71 to english language (2110)  
590 73. limit 72 to humans (1911)  
591 74. limit 73 to yr="1990 -Current" (1817)  
592 75. remove duplicates from 74 (1817)

593  
594  
595  
596

**Appendix B**

Detailed summary of included studies.

**Table B1.** Full summary of included studies.

| Lead author, year, study design                        | Setting, sample size in analysis (%female)         | Type of exposure | Age exposure assessed                        | Age outcome assessed (mean age) | Outcome measured                                                                | Key findings                                                                                                                                                                                                                                                                                                                                                                                                                                                                                              |
|--------------------------------------------------------|----------------------------------------------------|------------------|----------------------------------------------|---------------------------------|---------------------------------------------------------------------------------|-----------------------------------------------------------------------------------------------------------------------------------------------------------------------------------------------------------------------------------------------------------------------------------------------------------------------------------------------------------------------------------------------------------------------------------------------------------------------------------------------------------|
| High-income countries                                  |                                                    |                  |                                              |                                 |                                                                                 |                                                                                                                                                                                                                                                                                                                                                                                                                                                                                                           |
| <b>Angratt 2011[29]</b><br><b>Retrospective cohort</b> | Sweden, n=3579 (48%)                               | PI, BMI          | PI: birth, 1.5y<br>BMI: 2.5, 5y, 7y, 10y,15y | ~15y (14.5y)                    | Obesity (BMI>30)                                                                | Moderate/small correlations was found between PI at birth, 1.5y and BMI at 2.5y with BMI at 15y (r <0.5). Strong correlation between BMI at 5y, 7y, 10y with BMI at 15y (r>0.5).<br><br><u>Females:</u> 5y (r=0.63;0.601-0.658), 7y (r=0.70; 0.675-0.723), 10y (r=0.81;0.793-0.826)<br><br><u>Males:</u> 5y (r=0.57; 0.538-0.600), 7y (r=0.68;0.655-0.704), 10y (r=0.79;0.772-0.807)                                                                                                                      |
| <b>Barker 2005,[30]</b><br><b>Birth cohort 1934-44</b> | Finland, N= 444 (19.6%)<br>Clinical subset: n=2003 | PI, BMI          | Birth-11y                                    | ~37-64y                         | Coronary events<br>Clinical subsample: fasting plasma glucose, insulin, sBP, TC | For both sexes fasting plasma glucose, insulin and sBP fell both with increasing birth weight and with increasing BMI at 2y. TC was not associated with birth weight or BMI at 2y.<br><br><u>Females:</u> BMIs at 2 and 11y not associated with later coronary events. BMIs at 2 and 11y associated with later coronary events in a simultaneous regression (P=0.001 and P=0.04, respectively). The HR associated with an increase in BMI of 1 SD were 0.62 (CI 0.46-0.82) at 2 years of age and 1.35 (CI |

|                                                |                            |         |                               |         |                                                                                                                                    |                                                                                                                                                                                                                                                                                                                                                                                                                                                                                                                                                                                                                                                                                                                                                                                                                                                                                                                                                                                                                                                                                                                                                                                                                                                                                                                                                                                                                                                                                                                                                                                                                                                                                         |
|------------------------------------------------|----------------------------|---------|-------------------------------|---------|------------------------------------------------------------------------------------------------------------------------------------|-----------------------------------------------------------------------------------------------------------------------------------------------------------------------------------------------------------------------------------------------------------------------------------------------------------------------------------------------------------------------------------------------------------------------------------------------------------------------------------------------------------------------------------------------------------------------------------------------------------------------------------------------------------------------------------------------------------------------------------------------------------------------------------------------------------------------------------------------------------------------------------------------------------------------------------------------------------------------------------------------------------------------------------------------------------------------------------------------------------------------------------------------------------------------------------------------------------------------------------------------------------------------------------------------------------------------------------------------------------------------------------------------------------------------------------------------------------------------------------------------------------------------------------------------------------------------------------------------------------------------------------------------------------------------------------------|
| East 2020,[31]                                 | Chile,<br>n=1000 (n/r)     | BMI, WC | Birth, 3mo,<br>6mo, 1y-23y    | ~23y    | CM risk: sBP,<br>dBp, fasting<br>serum, total<br>glucose, TG, TC,<br>HDL-C, high<br>sensitivity CRP,<br>abdominal<br>obesity, Mets | <p>1.02-1.78) at 11 years.</p> <p><u>Males:</u> Low BMI and PI at birth, and BMI at 1 and 2y predicted later coronary events (all <math>p &lt; 0.001</math>). BMI at 11y not associated with coronary events on its own, however, in a simultaneous regression, low BMI at 2y and high BMI at 11 were associated with coronary events (<math>p &lt; 0.001</math> and <math>p = 0.05</math>, respectively).</p> <p>The HR associated with an increase in BMI of 1 SD were 0.76 (CI 0.66-0.87) at 2 years of age and 1.14 (CI 1.00-1.31) at 11 years.</p> <p>All results are presented as data from regression models (Y axis: mean BMI, X axis: age in years) in 'risk present vs risk absent' clusters.</p> <p>Hyperglycemia: <i>slope 6mo-5y:</i> 0.05 vs -0.12, <i>intercept 5y:</i> 18.05 vs 16.78, <i>slope 5-23y:</i> 3.17 vs 2.93</p> <p>High TG; <i>slope 6mo-5y:</i> -0.003 vs -0.13, <i>intercept 5y:</i> 17.82 vs 16.69, <i>slope 5-23y:</i> 3.76 vs 3.07.</p> <p>Low LDL-C: <i>slope 6mo-5y:</i> 0.04 vs -0.13, <i>intercept 5y:</i> 17.02 vs 16.56, <i>slope 5-23y:</i> 3.29 vs 2.99</p> <p>Hypertension: <i>slope 6mo-5y:</i> 0.04 vs -.13, <i>intercept 5y:</i> 18.54 vs 16.66, <i>slope 5-23y:</i> 4.00 vs 3.09</p> <p>Abdominal obesity: <i>slope 6mo-5y:</i> 0.05 vs -0.17, <i>intercept 5y:</i> 18.12 vs 16.25, <i>slope 5-23y:</i> 4.20 vs 2.70</p> <p>Mets: <i>slope 6mo-5y:</i> 0.07 vs -0.13, <i>intercept 5y:</i> 18.44 vs 16.59, <i>slope 5-23y:</i> 4.22 vs 3.03</p> <p>All CM risks were associated with a higher BMI at 5y. Children who became obese in adult life had above-average BMIs at all ages from birth to 12y (all <math>p &lt; 0.001</math>)</p> |
| Eriksson 2003,[32]<br><br>Birth cohort 1934-44 | Finland,<br>n=4515 (52.7%) | PI, BMI | Birth, 3y, 5y,<br>7y, 9y, 11y | ~56-66y | Obesity (BMI<br>>30)                                                                                                               | <p>All CM risks were associated with a higher BMI at 5y. Children who became obese in adult life had above-average BMIs at all ages from birth to 12y (all <math>p &lt; 0.001</math>)</p>                                                                                                                                                                                                                                                                                                                                                                                                                                                                                                                                                                                                                                                                                                                                                                                                                                                                                                                                                                                                                                                                                                                                                                                                                                                                                                                                                                                                                                                                                               |

|                                                          |                                                                     |     |              |                                                 |                                                                                      |                                                                                                                                                                                                                                                        |                                                                                                                                                                                                                                                                                                                                                                                                                                                                                                                                                                                                                                                                                                                 |
|----------------------------------------------------------|---------------------------------------------------------------------|-----|--------------|-------------------------------------------------|--------------------------------------------------------------------------------------|--------------------------------------------------------------------------------------------------------------------------------------------------------------------------------------------------------------------------------------------------------|-----------------------------------------------------------------------------------------------------------------------------------------------------------------------------------------------------------------------------------------------------------------------------------------------------------------------------------------------------------------------------------------------------------------------------------------------------------------------------------------------------------------------------------------------------------------------------------------------------------------------------------------------------------------------------------------------------------------|
| Eriksson 2015,[33]                                       | Finland,<br>n=13345 (n/r)<br>clinical<br>subsample:<br>n=2003 (n/r) | BMI | Birth-11y    | 40+ y<br>Clinical<br>subsample<br>mean age: 62y | T2D<br><br>Clinical<br>subsample:<br>body<br>composition and<br>glucose<br>tolerance | <u>Females:</u> A PI >18.5 at birth had an OR> 3 of becoming obese as adults vs those with a PI<18.5.                                                                                                                                                  | <u>Males:</u> A PI >18.5 at birth had an OR> 4 of becoming obese as adults vs those with a PI<18.5.<br>Among children with a BMI above the median at 11y (group 1), each unit increase in BMI Z-score from birth to 7y reduced the risk of T2D. After 7y a higher BMI z-score was associated with increased risk of T2D.<br>Among children with a BMI below the median at 11y (group 2), each unit increase in BMI Z-score reduced the risk of T2D from birth to 11y.<br>In group 1, low BMI at birth and at 2y and high BMI at 11y were associated with T2D (OR0.87;0.80-0.95, OR0.86;0.78-0.94, OR1.61;1.40-1.83, respectively).<br>In group 2, low BMI at birth was associated with T2D (OR:0.80;0.72-0.86). |
| Evensen 2019,[34]                                        | Norway,<br>n=907 (48%)                                              | BMI | Birth-2y, 6y | ~15-20                                          | Adiposity (DXA scan),<br>overweight/obesity (BMI>25)                                 | <u>Females:</u> Increased risk of T2D in girls with BMI above the median at 11y (OR1.35;1.10-1.65;p=0.004) vs those below the median value.                                                                                                            | <u>Males:</u> Increased risk of T2D in boys with BMI above the median at 11y (OR1.23;1.05-1.44;p=0.01) vs those below the median value.                                                                                                                                                                                                                                                                                                                                                                                                                                                                                                                                                                         |
| Prospective cohort<br>(The Tromsø Study:<br>Fit Futures) |                                                                     |     |              |                                                 |                                                                                      | Birth weight associated with FFMI.<br><u>Females:</u> Overweight/obesity at 2.5y is associated with increased odds of higher FMI SDS at 15-20y (OR 2.00; 1.03-3.89; p<0.05) vs normal weight.<br>Overweight/obesity at 6y is associated with increased |                                                                                                                                                                                                                                                                                                                                                                                                                                                                                                                                                                                                                                                                                                                 |

|                                          |                          |                                                                     |                |                 |                                                                                                |                                                                                                                                                                                                                                                                                                                                                                                                                |
|------------------------------------------|--------------------------|---------------------------------------------------------------------|----------------|-----------------|------------------------------------------------------------------------------------------------|----------------------------------------------------------------------------------------------------------------------------------------------------------------------------------------------------------------------------------------------------------------------------------------------------------------------------------------------------------------------------------------------------------------|
|                                          |                          |                                                                     |                |                 |                                                                                                | odds of having a WC>80cm at 15-20y (OR 4.79; 3.05-7.48; p<0.001) vs normal weight.                                                                                                                                                                                                                                                                                                                             |
| <b>Geserick 2018,[35]</b>                | Germany, 34196 (n/r)     | BMI                                                                 | Birth-18y      | ~18y            | Obesity                                                                                        | <u>Males:</u> Overweight/obesity at 6y was associated with increased odds of having a WC>94 cm (OR 5.56;3.25, 9.54;p<0.001) and higher FMI SDS (OR 4.14; 2.41,7.09;p<0.001) at age 15-20 vs normal weight.                                                                                                                                                                                                     |
| <b>Retrospective cohort</b>              |                          |                                                                     |                |                 |                                                                                                | Accelerated annual change in BMI SDS ( $\geq 0.2$ to $<2.0$ ) in children 2-6y associated with overweight/obesity at 18y (RR1.43; 1.35-1.49) vs those with a stable BMI.                                                                                                                                                                                                                                       |
| <b>Giudici, 2017,[36]</b>                | France, n=1919 (56.6%)   | BMI, WC                                                             | Birth-10y      | ~20-60y (30.7y) | WC, MetS: sBP, dBP, total glucose, TG, HDL-C, LDL-C                                            | Adults with MetS presented higher BMI from age 4-6y (p=0.01) and 7-10y (p<0.001) compared to adults without MetS.                                                                                                                                                                                                                                                                                              |
| <b>Retrospective cohort</b>              |                          |                                                                     |                |                 |                                                                                                | Adults with high WC (men; >94cm, women; >80cm) presented higher BMI at all ages (p-global <0.001). Adults with high TG concentrations presented higher BMI from age 1.5y (p-global=0.001). No association between low aHDL-C and BMI in childhood (p-global=0.62). No association between hyperglycemia and BMI in childhood (p-global=0.23). No association between aBP and BMI in childhood (p-global=0.18). |
| <b>Golab 2019,[37]</b>                   | Netherlands, n=593 (n/r) | Skinfold thicknesses: biceps, triceps, suprailiacal and subscapular | 1.5mo, 6mo, 2y | ~10y            | BMI, adiposity (DXA): FMI, subcutaneous FMI, visceral FMI, pericardial FMI, liver fat fraction | Higher central-to-total FM ratio at 1.5 months associated with higher BMI (p<0.05), FMI (p<0.01) and subcutaneous FMI at age 10 (p<0.01). Higher total subcutaneous FM at 6mo and 2y associated with higher BMI, FMI and subcutaneous FM at age 10. All p<0.01, except for BMI at 6 mo (p<0.05).                                                                                                               |
| <b>Birth cohort (Generation R Study)</b> |                          |                                                                     |                |                 |                                                                                                |                                                                                                                                                                                                                                                                                                                                                                                                                |

|                                                        |                                  |                |                                       |                                                              |                                                                                                                                                                                                                                                                                                                                                                                                                                                                                                                                                                                                                                                                                                                                                      |
|--------------------------------------------------------|----------------------------------|----------------|---------------------------------------|--------------------------------------------------------------|------------------------------------------------------------------------------------------------------------------------------------------------------------------------------------------------------------------------------------------------------------------------------------------------------------------------------------------------------------------------------------------------------------------------------------------------------------------------------------------------------------------------------------------------------------------------------------------------------------------------------------------------------------------------------------------------------------------------------------------------------|
| <b>Graversen 2014,[38]</b><br><b>Birth cohort 1996</b> | Finland,<br>n=2120 (51.4%)       | Weight,<br>BMI | Weight: 5mo, ~31y<br>1 y<br>BMI: 2-5y | BMI, WC, MetS:<br>TG, HDL-C,<br>sBP, dBP,<br>fasting glucose | <p>No association between exposure and visceral fat, pericardial fat and liver fat (all <math>p&gt;0.05</math>).</p> <p>Children with a BMI in the <math>\geq 50</math>-<math>&lt;75</math> and <math>\geq 95</math> percentile at age 3 had increased risk of MetS (RR1.6; 1.2-2.1 and RR1.9; 1.2-3.0 respectively) vs those in the <math>\geq 5</math>-<math>&lt;50</math> percentile.</p> <p>BMI at <math>\geq 95</math> percentile at 4y and 5y had increased risk of MetS at age 31y (RR 2.4;1.6-3.5 and RR 2.5;1.7-3.8 respectively) vs those in the <math>\geq 5</math>-<math>&lt;50</math> percentile.</p>                                                                                                                                   |
| <b>Holland 1993,[39]</b><br><b>Birth cohort (NHSD)</b> | Great Britain,<br>n=2830 (49.8%) | BMI            | 2y, 4y, 6-7y, ~36y<br>11y, 14y        | BMI, BP                                                      | <p>Linear relationship with BMI from birth to 5y with <math>\Delta</math>BMI and <math>\Delta</math>WC. BMI from 3-5y inversely associated with <math>\Delta</math>HDL-C.</p> <p><u>Females:</u><br/><u>sBP:</u><br/>1 unit increase in BMI SDS between birth and 7y is associated with 1.4 mmHg rise (CI:0.7-2.1)<br/>1 unit increase in BMI SDS between 7y and adolescence is associated with 1.0 mmHg rise (CI:0-2.0)</p> <p><u>dBP:</u><br/>1 unit increase in BMI SDS between birth and 7y is associated with 0.5 mmHg rise (CI:0-1.1)<br/>1 unit increase in BMI SDS between 7y and adolescence is associated with 0.3 mmHg rise (CI:-0.5-1.1)</p> <p><u>Males:</u><br/><u>sBP:</u><br/>1 unit increase in BMI SDS between birth and 7y is</p> |



|                     |                          |         |           |              |                                                                |                                                                                                                                                                                                                                                                                                                                                                       |
|---------------------|--------------------------|---------|-----------|--------------|----------------------------------------------------------------|-----------------------------------------------------------------------------------------------------------------------------------------------------------------------------------------------------------------------------------------------------------------------------------------------------------------------------------------------------------------------|
|                     |                          |         |           |              |                                                                | <p>associated with 0.7 mmHg rise (CI:0-1.4)</p> <p>1 unit increase in BMI SDS between 7y and adolescence is associated with 1.4 mmHg rise (CI:0.5-2.3)</p>                                                                                                                                                                                                            |
|                     |                          |         |           |              |                                                                | <p>dBP:</p> <p>1 unit increase in BMI SDS between birth and 7y is associated with 1.0 mmHg rise (CI:0.4-1.6)</p> <p>1 unit increase in BMI SDS between 7y and adolescence is associated with 1.7 mmHg rise (CI:0.9-2.4)</p>                                                                                                                                           |
| Howe 2010,[40]      | UK,<br>n=5113 (52.8%)    | PI, BMI | Birth-15y | ~15y (15.5y) | CVD risk: BP,<br>HDL-C, LDL-C,<br>TG, CRP,<br>glucose, insulin | <p>Little evidence of association between PI changed from 0-2y and CVD risk at 15y (p-values n/r). Associations between 1SD increase in BMI at 5-5.5y, 7-8.5y and 8.5-10y and several risk factors at 15y (stronger associations for HDL-C, log TG, sBP) (p-values n/r).</p>                                                                                          |
| Birth cohort (Avon) |                          |         |           |              |                                                                |                                                                                                                                                                                                                                                                                                                                                                       |
| Howe 2014,[41]      | England,<br>n=3154 (n/r) | BMI     | Birth-10y | ~17y (17.8y) | Brachial sBP,<br>central sBP, dBP                              | <p>For both sexes a 1SD z-score increase in BMI at 7y and 10y was associated with all three outcomes, increase in BP being higher at age 10 (all p&lt;0.001). All associations were stronger in males. No associations between BMI &lt;7y and later BP. Highest BP was seen in those with a low birthweight as well as overweight or obesity at age 2 and age 17.</p> |
| Birth cohort (Avon) |                          |         |           |              |                                                                | <p><u>Females:</u> Low BMI at birth associated with elevated brachial sBP at 17y (p=0.004), and with central sBP as well as dBP (p=0.001 and p=0.04 respectively).</p> <p><u>Males:</u> Low BMI at birth associated with elevated brachial sBP (p=0.04).</p>                                                                                                          |

|                                                                |                                  |                               |                                          |          |                                                                                              |                                                                                                                                                                                                                                                                                                                                                                                                                                                                                                                                                                                                                                                                                                |
|----------------------------------------------------------------|----------------------------------|-------------------------------|------------------------------------------|----------|----------------------------------------------------------------------------------------------|------------------------------------------------------------------------------------------------------------------------------------------------------------------------------------------------------------------------------------------------------------------------------------------------------------------------------------------------------------------------------------------------------------------------------------------------------------------------------------------------------------------------------------------------------------------------------------------------------------------------------------------------------------------------------------------------|
| Huang 2012,[42]<br>Birth cohort (Raine)                        | Australia,<br>n=1053 (n/r)       | BMI,<br>skinfold<br>thickness | 1-3y, 5y, 8y,<br>10y, 14y                | ~17y     | CVD risk: BP,<br>insulin, glucose,<br>TG, BMI, TC,<br>HDL-C, LDL-C,<br>high-sensitive<br>CRP | <p><u>Females:</u> BMI from 1-5y was higher at each subsequent timepoint (all <math>p \leq 0.001</math>) in high risk cluster vs. low risk cluster.</p> <p>High-risk group showed greater abdominal, subscapular, and suprailiac skinfold thicknesses and chest circumference from 1-5y of age (all <math>p &lt; 0.05</math>).</p> <p><u>Males:</u> BMI at 3y was higher in high-risk vs low-risk group (<math>p \leq 0.001</math>).</p> <p>High-risk group showed greater abdominal, subscapular, and suprailiac skinfold thicknesses and chest circumference from 3-5y (all <math>p \leq 0.001</math>).</p> <p><u>Females:</u> no statistical association, all <math>p &lt; 0.05</math>.</p> |
| Johnson 2014,[43]<br>Birth cohort (NSHD)                       | Great Britain,<br>n=1273 (52.6%) | BMI                           | Birth, 2y, 4y,<br>6-7y, 11y,<br>25y, 20y | ~60-64   | cIMT                                                                                         | <p><u>Males:</u> 1 unit increase in z-score BMI at 4y and 20y increased odds of high cIMT (OR 1.26;1.03-1.54; <math>p=0.03</math>, OR1.28;1.02-1.61; <math>p=0.03</math> respectively) in the upper vs the 3 lower quartiles.</p>                                                                                                                                                                                                                                                                                                                                                                                                                                                              |
| Johnson 2017,[44]<br>Birth cohort (Fels<br>Longitudinal study) | USA,<br>n=350 (52.6%)            | BMI                           | 9mo                                      | ~20-60y  | BMI, FMI, FFMI                                                                               | <p>1 unit increase in infant BMI Z-score associated with BMI at 20y (<math>\beta=0.70;0.31-1.09</math>; <math>p &lt; 0.001</math>).</p> <p>1 unit increase in infant BMI Z-score associated with FFMI at 20y (<math>\beta=0.75;0.37-1.12</math>; <math>p &lt; 0.001</math>).</p> <p>1 unit increase in infant BMI Z-score associated with FFMI at 30y (<math>\beta=0.34; 0.12-0.56</math>).</p> <p>No associations between infant BMI and body composition after age 30.</p>                                                                                                                                                                                                                   |
| Kwon 2017,[45]                                                 | USA,                             | BMI                           | 1.5mo, 3mo,                              | ~8y, 19y | Adiposity (DXA)                                                                              | Trajectories of BMI were analysed, trends were                                                                                                                                                                                                                                                                                                                                                                                                                                                                                                                                                                                                                                                 |

|                                             |                                                                    |     |                              |                 |                                |                                                                                                                                                                                                                                                                                                                                                                                                                                           |
|---------------------------------------------|--------------------------------------------------------------------|-----|------------------------------|-----------------|--------------------------------|-------------------------------------------------------------------------------------------------------------------------------------------------------------------------------------------------------------------------------------------------------------------------------------------------------------------------------------------------------------------------------------------------------------------------------------------|
| <b>Birth cohort (Iowa Fluoride Study)</b>   | n=1093 (n/r)<br>Adiposity (DXA) subset at 8y and 19y: n=495, n=314 |     | 6mo, 9mo, 1y, 16mo, 20mo, 2y |                 | scan)                          | identified, SP was divided into “consistently low BMI in childhood” (group 1), “steep increase in BMI second year of life” (group 2), “steep increase in BMI the first year of life” (group 3), “consistently high BMI in childhood” (group 4)<br><br><u>Females:</u> Group and group 4 had higher FMI at age 8y and 19y than group 1 and group 2. P-values <0.01 and 0.04 respectively.<br><br><u>Males:</u> no statistical association. |
| <b>Lagström 2008,[46]</b>                   | Finland, n= 541 (n/r)                                              | BMI | Birth, 7mo, 13mo, 2-13y      | ~13y            | Obesity (Cole’s cut-off point) | <u>Females:</u> Girls who were overweight at 13y exceeded cut-off point for overweight (22.58 kg/m <sup>3</sup> ) from age 5y onward.<br><br><u>Males:</u> Boys who were overweight at 13y exceeded cut-off point for overweight (21.91 kg/m <sup>3</sup> ) from age 8y onward.                                                                                                                                                           |
| <b>Prospective randomized trial (STRIP)</b> |                                                                    |     |                              |                 |                                | Increased risk (OR 1.87;1.04-3.37, <i>p</i> = 0.04) of T2D with a gain of 1kg/m <sup>2</sup> in the minimum BMI at between 3 and 11y old vs those who gained less than 1kg/m <sup>2</sup> .                                                                                                                                                                                                                                               |
| <b>Lammi 2009,[47]</b>                      | Finland, n =128 (n/r)                                              | BMI | Birth-11y                    | ~15-39y (34.5y) | T2D diagnose                   | <u>Females:</u> No association was seen in women.                                                                                                                                                                                                                                                                                                                                                                                         |
| <b>Case-control study</b>                   |                                                                    |     |                              |                 |                                |                                                                                                                                                                                                                                                                                                                                                                                                                                           |
| <b>Salonen 2009,[27]</b>                    | Finland, n=588 (n/r)                                               | BMI | Birth-11y                    | ~56-70 (61.5y)  | BMI                            | <u>Males:</u> Inverse association between MetS and 1 SD z-score increase in BMI between ages 0-2y (OR0.53;0.33-0.87).                                                                                                                                                                                                                                                                                                                     |
| <b>Birth cohort 1934-44</b>                 | Clinical subset: 2003 (n/r)<br>* Normal weight SP in adulthood     |     |                              |                 | Clinical subsample: MetS       |                                                                                                                                                                                                                                                                                                                                                                                                                                           |
| <b>Skidmore 2007,[48]</b>                   | Great Britain, n=2311 (n/r)                                        | BMI | 2y, 4y,7y, 11y, 15y, 36y     | ~53y            | Lipid levels                   | Negative association between TC and 1 SD increase in BMI at age 2 and 4y ( <i>p</i> =0.007 and 0.003 respectively).                                                                                                                                                                                                                                                                                                                       |

## Birth cohort (NSHD)

Positive associations between BMI at 36-56 and TC and LDL-C (all  $p < 0.05$ ). All results are reported after adjusting for adult BMI, except age 36 and 53.

Females:

Negative association between BMI from 7-15y and HDL-C (regression coefficient -0.098; -0.139 to -0.057;  $p < 0.001$ )

Males:

Negative association between BMI from 7-15y and HDL-C (regression coefficient -0.044; -0.079 to -0.010;  $p = 0.01$ )

Ziyab 2014,[49] UK, BMI 1-2y, 4y, 10y ~18y BP  
 Birth cohort (The Isle of Wight birth cohort) n=1240 (n/r)

Early persistent obesity trajectory (IOTF cut-offs for obesity were exceeded at age 4, 10 and 18y) experienced higher sBP (mean difference 11.3mmHg) and dBP (mean difference 12mmHg) than the normal trajectory. All  $p < 0.001$ .

Delayed overweight (IOTF thresholds for overweight were crossed at age 10 and 18y) experienced higher sBP (mean difference 6.1mmHg) and dBP (mean difference 5.5mmHg) than the normal trajectory.

597 Notes:  $\hat{u}$  = increased.

598 Abbreviations: a: adult; **BMI**: body mass index; **BP**: blood pressure; **CI**: confidence intervals; **CM**: cardiometabolic; **cIMT**: carotid intima-media thickness; **CRP**: c-reactive protein;

599 **CVD**: cardiovascular; **dBp**: diastolic blood pressure; **DM**: diabetes mellitus; **DXA**: dual energy X-ray absorptiometry; **FFM**: fat free mass; **FFMI**: fat free mass index; **FM**: fat mass;

600 **FMI**: fat mass index; **HDL-C**: high density lipoprotein cholesterol; **HOMA-IR**: Homeostatic Model Assessment for Insulin Resistance; **HR**: hazard ratio; **LBW**: low birth weight;

601 **LDL-C**: low density lipoprotein cholesterol; **IGT**: impaired glucose tolerance; **INCAP**: Institute of Nutrition of Central America and Panama Oriente; **IOTF**: International Obesity

602 Taskforce; **MetS**: metabolic syndrome; **n**: sample size included in analysis; **NHSD**: National Survey of Health and Development Cohort; **n/r**: not reported; **OR**: odds ratio; **PBF**:

603 percentage body fat; **PI**: ponderal index; **RR**: risk ratio; **sBP**: systolic blood pressure; **SD**: standard deviation; **SF**: skinfold; **SP**: study population; **STRIP**: Special Turku Coronary  
604 Risk Factor Intervention Project; **TC**: total cholesterol; **TG**: total glucose; **T2D**: type 2 diabetes; **WC**: waist circumference; **WHR**: waist hip ratio

---

605 **References**

- 606 [1] Mendis S, Armstrong T, Bettcher D, Branca F, Lauer J, Mace C, et al. Global Status Report On  
607 Noncommunicable Diseases 2014. Geneva: 2014.
- 608 [2] Ajay VS, Watkins DA PD. Relationships among Major Risk Factors and the Burden of Cardiovascular Diseases,  
609 Diabetes, and Chronic Lung Disease. In: Prabhakaran D, Anand S, Gaziano TA, et al. editors., editor.  
610 Cardiovasc. Respir. Relat. Disord. 3rd Ed., Washington, D.C.: The World Bank; 2017.  
611 doi:[https://doi.org/10.1596/978-1-4648-0518-9\\_ch2](https://doi.org/10.1596/978-1-4648-0518-9_ch2).
- 612 [3] Branca F, Lartey A, Oenema S, Aguayo V, Stordalen GA, Richardson R, et al. Transforming the food system to  
613 fight non-communicable diseases. *BMJ* 2019;364:l296-l296. doi:<https://doi.org/10.1136/bmj.l296>.
- 614 [4] Vijayaraghavan K. Anthropometry for assessment of nutritional status. *Indian J Pediatr* 1987;54:511-20.  
615 doi:<https://doi.org/10.1007/BF02749045>.
- 616 [5] Kerac M, McGrath M, Connell N, Kompala C, Moore WH, Bailey J, et al. 'Severe malnutrition': thinking  
617 deeply, communicating simply. *BMJ Glob Heal* 2020;5:e003023. doi:<https://doi.org/10.1136/bmjgh-2020-003023>.
- 618 [6] Wells JCK. Body composition of children with moderate and severe undernutrition and after treatment: a  
619 narrative review. *BMC Med* 2019;17:215. doi:<https://doi.org/10.1186/s12916-019-1465-8>.
- 620 [7] Owino VO, Murphy-Alford AJ, Kerac M, Bahwere P, Friis H, Berkley JA, et al. Measuring growth and  
621 medium- and longer-term outcomes in malnourished children. *Matern Child Nutr* 2019;15:1-10.  
622 doi:<https://doi.org/10.1111/mcn.12790>.
- 623 [8] Kumaran K, Lubree H, Bhat DS, Joshi S, Joglekar C, Yajnik P, et al. Birth weight, childhood and adolescent  
624 growth and diabetes risk factors in 21-year-old Asian Indians: the Pune Children's Study. *J Dev Orig Health Dis*  
625 2020:1-10. doi:<https://doi.org/10.1017/S2040174420000707>.
- 626 [9] Pullar J, Wickramasinghe K, Demaio AR, Roberts N, Perez-Blanco K-M, Noonan K, et al. The impact of  
627 maternal nutrition on offspring's risk of non-communicable diseases in adulthood: a systematic review. *J Glob*  
628 *Health* 2019;9:20405. doi:<https://doi.org/10.7189/jogh.09.020405>.
- 629 [10] Barouki R, Gluckman PD, Grandjean P, Hanson M, Heindel JJ. Developmental origins of non-communicable  
630 disease: Implications for research and public health. *Environ Heal* 2012;11:42. doi:<https://doi.org/10.1186/1476-069X-11-42>.
- 631 [11] Forsén T, Eriksson JG, Tuomilehto J, Osmond C, Barker DJ. Growth in utero and during childhood among  
632 women who develop coronary heart disease: longitudinal study. *BMJ* 1999;319:1403-7.  
633 doi:<https://doi.org/10.1136/bmj.319.7222.1403>.
- 634 [12] Pineda E, Sanchez-Romero LM, Brown M, Jaccard A, Jewell J, Galea G, et al. Forecasting Future Trends in  
635 Obesity across Europe: The Value of Improving Surveillance. *Obes Facts* 2018;11:360-71.  
636 doi:<https://doi.org/10.1159/000492115>.
- 637 [13] Bogers RP, Bemelmans WJE, Hoogenveen RT, Boshuizen HC, Woodward M, Knekt P, et al. Association of  
638 overweight with increased risk of coronary heart disease partly independent of blood pressure and cholesterol  
639 levels: a meta-analysis of 21 cohort studies including more than 300 000 persons. *Arch Intern Med*  
640 2007;167:1720-8. doi:<https://doi.org/10.1001/archinte.167.16.1720>.
- 641 [14] Wells JC, Sawaya AL, Wibaek R, Mwangome M, Poullas MS, Yajnik CS, et al. The double burden of  
642 malnutrition: aetiological pathways and consequences for health. *Lancet* 2020;395:75-88.  
643 doi:[https://doi.org/https://doi.org/10.1016/S0140-6736\(19\)32472-9](https://doi.org/https://doi.org/10.1016/S0140-6736(19)32472-9).
- 644 [15] Grey K, Gonzales GB, Abera M, Lelijveld N, Thompson D, Berhane M, et al. Severe malnutrition or famine  
645 exposure in childhood and cardiometabolic non-communicable disease later in life: a systematic review. *BMJ*  
646
-

- 647 *Glob Heal* 2021;6:e003161. doi:<https://doi.org/10.1136/bmjgh-2020-003161>.
- 648 [16] Fabiansen C, Cichon B, Yaméogo CW, Iuel-Brockdorf A-S, Phelan KPQ, Wells JC, et al. Association between  
649 admission criteria and body composition among young children with moderate acute malnutrition, a cross-  
650 sectional study from Burkina Faso. *Sci Rep* 2020;10:13266. doi:<https://doi.org/10.1038/s41598-020-69987-9>.
- 651 [17] Lelijveld N, Musyoki E, Adongo SW, Mayberry A, Wells JC, Opondo C, et al. Relapse and post-discharge body  
652 composition of children treated for acute malnutrition using a simplified, combined protocol: A nested cohort  
653 from the CompAS RCT. *PLoS One* 2021;16:e0245477–e0245477. doi:<https://doi.org/10.1371/journal.pone.0245477>.
- 654 [18] Wells JCK. The capacity–load model of non-communicable disease risk: understanding the effects of child  
655 malnutrition, ethnicity and the social determinants of health. *Eur J Clin Nutr* 2018;72:688–97.  
656 doi:<https://doi.org/10.1038/s41430-018-0142-x>.
- 657 [19] Ford ND, Martorell R, Mehta NK, Ramirez-Zea M, Stein AD, N.D. F, et al. Life-course body mass index  
658 trajectories are predicted by childhood socioeconomic status but not exposure to improved nutrition during  
659 the first 1000 days after conception in guatemalan adults. *J Nutr* 2016;146:2368–74.  
660 doi:<https://doi.org/http://dx.doi.org/10.3945/jn.116.236075>.
- 661 [20] Ylihärsilä H, Kajantie E, Osmond C, Forsén T, Barker DJP, Eriksson JG. Birth size, adult body composition and  
662 muscle strength in later life. *Int J Obes* 2007;31:1392–9. doi:<https://doi.org/10.1038/sj.ijo.0803612>.
- 663 [21] Simmonds M, Burch J, Llewellyn A, Griffiths C, Yang H, Owen C, et al. The use of measures of obesity in  
664 childhood for predicting obesity and the development of obesity-related diseases in adulthood: A systematic  
665 review and meta-analysis. *Health Technol Assess (Rockv)* 2015;19.  
666 doi:<https://doi.org/http://dx.doi.org/10.3310/hta19430>.
- 667 [22] Brisbois TD, Farmer AP, McCargar LJ. Early markers of adult obesity: a review. *Obes Rev* 2012;13:347–67.  
668 doi:<https://doi.org/10.1111/j.1467-789X.2011.00965.x>.
- 669 [23] Singh AS, Mulder C, Twisk JWR, Van Mechelen W, Chinapaw MJM. Tracking of childhood overweight into  
670 adulthood: a systematic review of the literature. *Obes Rev* 2008;9:474–88. doi:<https://doi.org/10.1111/j.1467-789X.2008.00475.x>.
- 671
- 672 [24] Park MH, Falconer C, Viner RM, Kinra S. The impact of childhood obesity on morbidity and mortality in  
673 adulthood: a systematic review. *Obes Rev* 2012;13:985–1000. doi:<https://doi.org/10.1111/j.1467-789X.2012.01015.x>.
- 674 [25] Moher D, Liberati A, Tetzlaff J, Altman DG, Group TP. Preferred Reporting Items for Systematic Reviews and  
675 Meta-Analyses: The PRISMA Statement. *PLOS Med* 2009;6:e1000097.
- 676 [26] National Institute for Health and Clinical. Methods for the development of NICE public health guidance (third  
677 edition). London, United Kingdom: 2012.
- 678 [27] Salonen MK, Kajantie E, Osmond C, Forsén T, Ylihärsilä H, Paile-Hyvärinen M, et al. Childhood growth and  
679 future risk of the metabolic syndrome in normal-weight men and women. *Diabetes Metab* 2009;35:143–50.  
680 doi:<https://doi.org/10.1016/j.diabet.2008.10.004>.
- 681 [28] Corvalán C, Gregory CO, Ramirez-Zea M, Martorell R, Stein AD. Size at birth, infant, early and later childhood  
682 growth and adult body composition: A prospective study in a stunted population. *Int J Epidemiol* 2007;36:550–  
683 7. doi:<https://doi.org/10.1093/ije/dym010>.
- 684 [29] Angbratt M, Ekberg J, Walter L, Timpka T. Prediction of obesity from infancy to adolescence. *Acta Paediatr*  
685 2011;100:1249–52. doi:<https://doi.org/http://dx.doi.org/10.1111/j.1651-2227.2011.02326.x>.
- 686 [30] Barker DJP, Osmond C, Forsén TJ, Kajantie E, Eriksson JG. Trajectories of growth among children who have  
687 coronary events as adults. *N Engl J Med* 2005;353:1802–9. doi:<https://doi.org/10.1056/NEJMoa044160>.
- 688 [31] East P, Delker E, Blanco E, Lozoff B, Correa P, Burrows R, et al. BMI Trajectories from Birth to 23 Years by

- 689 Cardiometabolic Risks in Young Adulthood. *Obesity* 2020;28:813–21. doi:<https://doi.org/10.1002/oby.22754>.
- 690 [32] Eriksson J, Forsén T, Osmond C, Barker D. Obesity from cradle to grave. *Int J Obes* 2003;27:722–7.  
691 doi:<https://doi.org/10.1038/sj.ijo.0802278>.
- 692 [33] Eriksson JG, Kajantie E, Lampl M, Osmond C. Trajectories of body mass index amongst children who develop  
693 type 2 diabetes as adults. *J Intern Med* 2015;278:219–26. doi:<https://doi.org/10.1111/joim.12354>.
- 694 [34] Evensen E, Emaus N, Furberg AS, Kokkvoll A, Wells J, Wilsgaard T, et al. Adolescent body composition and  
695 associations with body size and growth from birth to late adolescence. The Tromsø study: Fit Futures—A  
696 Norwegian longitudinal cohort study. *Pediatr Obes* 2019;14:1–13. doi:<https://doi.org/10.1111/ijpo.12492>.
- 697 [35] Geserick M, Vogel M, Gausche R, Lipek T, Spielau U, Keller E, et al. Acceleration of BMI in early childhood  
698 and risk of sustained obesity. *N Engl J Med* 2018;379:1303–12.  
699 doi:<https://doi.org/http://dx.doi.org/10.1056/NEJMoa1803527>.
- 700 [36] Giudici K V., Rolland-Cachera MF, Gusto G, Goxe D, Lantieri O, Hercberg S, et al. Body mass index growth  
701 trajectories associated with the different parameters of the metabolic syndrome at adulthood. *Int J Obes*  
702 2017;41:1518–25. doi:<https://doi.org/10.1038/ijo.2017.119>.
- 703 [37] Golab BP, Voerman E, Lugt A van der, Santos S, Jaddoe VW V. Subcutaneous fat mass in infancy and  
704 abdominal, pericardial and liver fat assessed by Magnetic Resonance Imaging at the age of 10 years. *Int J Obes*  
705 2019;43:392–401. doi:<https://doi.org/http://dx.doi.org/10.1038/s41366-018-0287-7>.
- 706 [38] Gravversen L, Sørensen TIA, Petersen L, Sovio U, Kaakinen M, Sandbaek A, et al. Preschool weight and body  
707 mass index in relation to central obesity and metabolic syndrome in adulthood. *PLoS One* 2014;9.  
708 doi:<https://doi.org/10.1371/journal.pone.0089986>.
- 709 [39] Holland FJ, Stark O, Ades AE, Peckham CS. Birth weight and body mass index in childhood, adolescence, and  
710 adulthood as predictors of blood pressure at age 36. *J Epidemiol Community Health* 1993;47:432–5.  
711 doi:<https://doi.org/10.1136/jech.47.6.432>.
- 712 [40] Howe LD, Tilling K, Benfield L, Logue J, Sattar N, Ness AR, et al. Changes in ponderal index and body mass  
713 index across childhood and their associations with fat mass and cardiovascular risk factors at age 15. *PLoS One*  
714 2010:e15186. doi:<https://doi.org/http://dx.doi.org/10.1371/journal.pone.0015186>.
- 715 [41] Howe LD, Chaturvedi N, Lawlor DA, Ferreira DLS, Fraser A, Davey Smith G, et al. Rapid increases in infant  
716 adiposity and overweight/obesity in childhood are associated with higher central and brachial blood pressure  
717 in early adulthood. *J Hypertens* 2014;32:1789–96. doi:<https://doi.org/10.1097/HJH.0000000000000269>.
- 718 [42] Huang R-C, Mori TA, Burrows S, Le Ha C, Oddy WH, Herbison C, et al. Sex dimorphism in the relation  
719 between early adiposity and cardiometabolic risk in adolescents. *J Clin Endocrinol Metab* 2012;97:E1014–22.  
720 doi:<https://doi.org/https://dx.doi.org/10.1210/jc.2011-3007>.
- 721 [43] Johnson W, Kuh D, Tikhonoff V, Charakida M, Woodside J, Whincup P, et al. Body Mass Index and Height  
722 From Infancy to Adulthood and Carotid Intima-Media Thickness at 60 to 64 Years in the 1946 British Birth  
723 Cohort Study. *Arterioscler Thromb Vasc Biol* 2014;34:654–60.  
724 doi:<https://doi.org/http://dx.doi.org/10.1161/ATVBAHA.113.302572>.
- 725 [44] Johnson W, Choh AC, Lee M, Towne B, Czerwinski SA, Demerath EW. Is infant body mass index associated  
726 with adulthood body composition trajectories? An exploratory analysis. *Pediatr Obes* 2017;12:10–8.  
727 doi:<https://doi.org/http://dx.doi.org/10.1111/ijpo.12100>.
- 728 [45] Kwon S, Janz KF, Letuchy EM, Burns TL, Levy SM. Association between body mass index percentile  
729 trajectories in infancy and adiposity in childhood and early adulthood. *Obesity* 2017;25:166–71.  
730 doi:<https://doi.org/10.1002/oby.21673>.



- 731 [46] Lagström H, Hakanen M, Niinikoski H, Viikari J, Rönnemaa T, Saarinen M, et al. Growth patterns and obesity  
732 development in overweight or normal-weight 13-year-old adolescents: The STRIP study. *Pediatrics*  
733 2008;122:14–6. doi:<https://doi.org/10.1542/peds.2007-2354>.
- 734 [47] Lammi N, Moltchanova E, Blomstedt PA, Tuomilehto J, Eriksson JG, Karvonen M. Childhood BMI trajectories  
735 and the risk of developing young adult-onset diabetes. *Diabetologia* 2009;52:408–14.  
736 doi:<https://doi.org/http://dx.doi.org/10.1007/s00125-008-1244-0>.
- 737 [48] Skidmore PML, Hardy RJ, Kuh DJ, Langenberg C, Wadsworth MEJ. Life course body size and lipid levels at 53  
738 years in a British birth cohort. *J Epidemiol Community Health* 2007;61:215–20.  
739 doi:<https://doi.org/10.1136/jech.2006.047571>.
- 740 [49] Ziyab AH, Karmaus W, Kurukulaaratchy RJ, Zhang HM, Arshad SH, A.H. Z, et al. Developmental trajectories  
741 of Body Mass Index from infancy to 18 years of age: prenatal determinants and health consequences. *J*  
742 *Epidemiol Community Heal* 2014;68:934–41. doi:<https://doi.org/http://dx.doi.org/10.1136/jech-2014-203808>.
- 743 [50] Bhargava SK, Sachdev HS, Fall CHD, Osmond C, Lakshmy R, Barker DJP, et al. Relation of serial changes in  
744 childhood body-mass index to impaired glucose tolerance in young adulthood. *N Engl J Med* 2004;350:865–75.  
745 doi:<https://doi.org/10.1056/NEJMoa035698>.
- 746 [51] Fall CHD, Sachdev HS, Osmond C, Lakshmy R, Biswas SD, Prabhakaran D, et al. Adult metabolic syndrome  
747 and impaired glucose tolerance are associated with different patterns of BMI gain during infancy: data from  
748 the New Delhi birth cohort. *Diabetes Care* 2008;31:2349–56. doi:<https://doi.org/http://dx.doi.org/10.2337/dc08-0911>.
- 750 [52] Krishnaveni G V, Veena SR, Srinivasan K, Osmond C, Fall CHD. Linear growth and fat and lean tissue gain  
751 during childhood: associations with cardiometabolic and cognitive outcomes in adolescent Indian children.  
752 *PLoS One* 2015;10:e0143231.
- 753 [53] Raghupathy P, Antonisamy B, Geethanjali FS, Saperia J, Leary SD, Priya G, et al. Glucose tolerance, insulin  
754 resistance and insulin secretion in young south Indian adults: Relationships to parental size, neonatal size and  
755 childhood body mass index. *Diabetes Res Clin Pract* 2010;87:283–92.  
756 doi:<https://doi.org/http://dx.doi.org/10.1016/j.diabres.2009.11.015>.
- 757 [54] Sachdev HS, Fall CHD, Osmond C, Lakshmy R, Biswas SKD, Leary SD, et al. Anthropometric indicators of  
758 body composition in young adults: relation to size at birth and serial measurements of body mass index in  
759 childhood in the New Delhi birth cohort. *Am J Clin Nutr* 2005;82:456–66.
- 760 [55] Weitz CA, Friedlaender FY, Friedlaender JS. Adult lipids associated with early life growth in traditional  
761 melanesian societies undergoing rapid modernization: A longitudinal study of the mid-20th century. *Am J Phys*  
762 *Anthropol* 2014;153:551–8. doi:<https://doi.org/10.1002/ajpa.22453>.
- 763 [56] Johnson W, Kuh D, Tikhonoff V, Charakida M, Woodside J, Whincup P, et al. Body mass index and height  
764 from infancy to adulthood and carotid intima-media thickness at 60 to 64 years in the 1946 British Birth Cohort  
765 Study. *Arterioscler Thromb Vasc Biol* 2014;34:654–60. doi:<https://doi.org/10.1161/ATVBAHA.113.302572>.
- 766 [57] Gallagher D, Visser M, Sepúlveda D, Pierson RN, Harris T, Heymsfield SB. How useful is body mass index for  
767 comparison of body fatness across age, sex, and ethnic groups? *Am J Epidemiol* 1996;143:228–39.  
768 doi:<https://doi.org/10.1093/oxfordjournals.aje.a008733>.
- 769 [58] Department of Health and Human Services. Centers For Disease Control. Body Mass Index: Considerations for  
770 Practitioners. 2011.
- 771 [59] Wells JCK. Historical cohort studies and the early origins of disease hypothesis: making sense of the evidence:  
772 Workshop on 'Nutritional models of the developmental origins of adult health and disease.' *Proc Nutr Soc*

- 773 2009;68:179–88. doi:<https://doi.org/DOI:10.1017/S0029665109001086>.
- 774 [60] Wells JCK, Shirley MK. Body composition and the monitoring of non-communicable chronic disease risk. *Glob*  
775 *Heal Epidemiol Genomics* 2016;1. doi:<https://doi.org/10.1017/gheg.2016.9>.
- 776 [61] Aihie Sayer A, Syddall HE, Dennison EM, Gilbody HJ, Duggleby SL, Cooper C, et al. Birth weight, weight at 1  
777 y of age, and body composition in older men: findings from the Hertfordshire Cohort Study. *Am J Clin Nutr*  
778 2004;80:199–203. doi:<https://doi.org/10.1093/ajcn/80.1.199>.
- 779 [62] Li H, Stein AD, Barnhart HX, Ramakrishnan U, Martorell R. Associations between prenatal and postnatal  
780 growth and adult body size and composition. *Am J Clin Nutr* 2003;77:1498–505.  
781 doi:<https://doi.org/10.1093/ajcn/77.6.1498>.
- 782 [63] Singhal A, Wells J, Cole TJ, Fewtrell M, Lucas A. Programming of lean body mass: a link between birth weight,  
783 obesity, and cardiovascular disease? *Am J Clin Nutr* 2003;77:726–30. doi:<https://doi.org/10.1093/ajcn/77.3.726>.
- 784 [64] Johnson W, Bann D, Hardy R. Infant weight gain and adolescent body mass index: comparison across two  
785 British cohorts born in 1946 and 2001. *Arch Dis Child* 2018;103:974–80.  
786 doi:<https://doi.org/http://dx.doi.org/10.1136/archdischild-2017-314079>.
- 787 [65] Sachdev HS, Fall CHD, Osmond C, Lakshmy R, Dey Biswas SK, Leary SD, et al. Anthropometric indicators of  
788 body composition in young adults: relation to size at birth and serial measurements of body mass index in  
789 childhood in the New Delhi birth cohort. *Am J Clin Nutr* 2005;82:456–66.  
790 doi:<https://doi.org/10.1093/ajcn.82.2.456>.
- 791 [66] Kraja AT, Borecki IB, North K, Tang W, Myers RH, Hopkins PN, et al. Longitudinal and age trends of  
792 metabolic syndrome and its risk factors: the Family Heart Study. *Nutr Metab (Lond)* 2006;3:41.  
793 doi:<https://doi.org/10.1186/1743-7075-3-41>.
- 794 [67] Head T, Daunert S, Goldschmidt-Clermont PJ. The Aging Risk and Atherosclerosis: A Fresh Look at Arterial  
795 Homeostasis. *Front Genet* 2017;8:216. doi:<https://doi.org/10.3389/fgene.2017.00216>.
- 796 [68] Olokoba AB, Obateru OA, Olokoba LB. Type 2 diabetes mellitus: a review of current trends. *Oman Med J*  
797 2012;27:269–73. doi:<https://doi.org/10.5001/omj.2012.68>.
- 798 [69] Lucas A, Fewtrell MS, Cole TJ. Fetal origins of adult disease-the hypothesis revisited. *BMJ* 1999;319:245–9.  
799 doi:<https://doi.org/10.1136/bmj.319.7204.245>.
- 800 [70] Ajala O, Mold F, Boughton C, Cooke D, Whyte M. Childhood predictors of cardiovascular disease in  
801 adulthood. A systematic review and meta-analysis. *Obes Rev* 2017;18:1061–70.  
802 doi:<https://doi.org/10.1111/obr.12561>.
- 803 [71] Umer A, Kelley GA, Cottrell LE, Giacobbi P, Innes KE, Lilly CL. Childhood obesity and adult cardiovascular  
804 disease risk factors: A systematic review with meta-analysis. *BMC Public Health* 2017;17.  
805 doi:<https://doi.org/10.1186/s12889-017-4691-z>.
- 806 [72] Lloyd LJ, Langley-Evans SC, McMullen S. Childhood obesity and risk of the adult metabolic syndrome: a  
807 systematic review. *Int J Obes (Lond)* 2012;36:1–11. doi:<https://doi.org/10.1038/ijo.2011.186>.
- 808 [73] Owen CG, Whincup PH, Orfei L, Chou QA, Rudnicka AR, Wathern AK, et al. Is body mass index before  
809 middle age related to coronary heart disease risk in later life? Evidence from observational studies. *Int J Obes*  
810 2009;33:866–77. doi:<https://doi.org/http://dx.doi.org/10.1038/ijo.2009.102>.
- 811 [74] Wells JCK. The capacity-load model of non-communicable disease risk: Understanding the effects of child  
812 malnutrition, ethnicity and the social determinants of health. *Eur J Clin Nutr* 2018;72:688–97.  
813 doi:<https://doi.org/10.1038/s41430-018-0142-x>.
- 814 [75] Ahrens W. Commentary: Socioeconomic status: more than a confounder? *Int J Epidemiol* 2004;33:806–7.

815           doi:<https://doi.org/10.1093/ije/dyh203>.

816 [76] Sharp MK, Hren D, Altman DG. The STROBE Extensions: Considerations for Development. *Epidemiology*  
817           2018;29.

818
